# Supplementary material
Source: PubMed Central journal article supplement (PMC2556027)
Supplement: M800016-MCP200_1.pdf [file M800016-MCP200_1.pdf]

Additional Supplemental Data with  
Supplemental Table 1  
MALDI-TOF Spectra Annotated

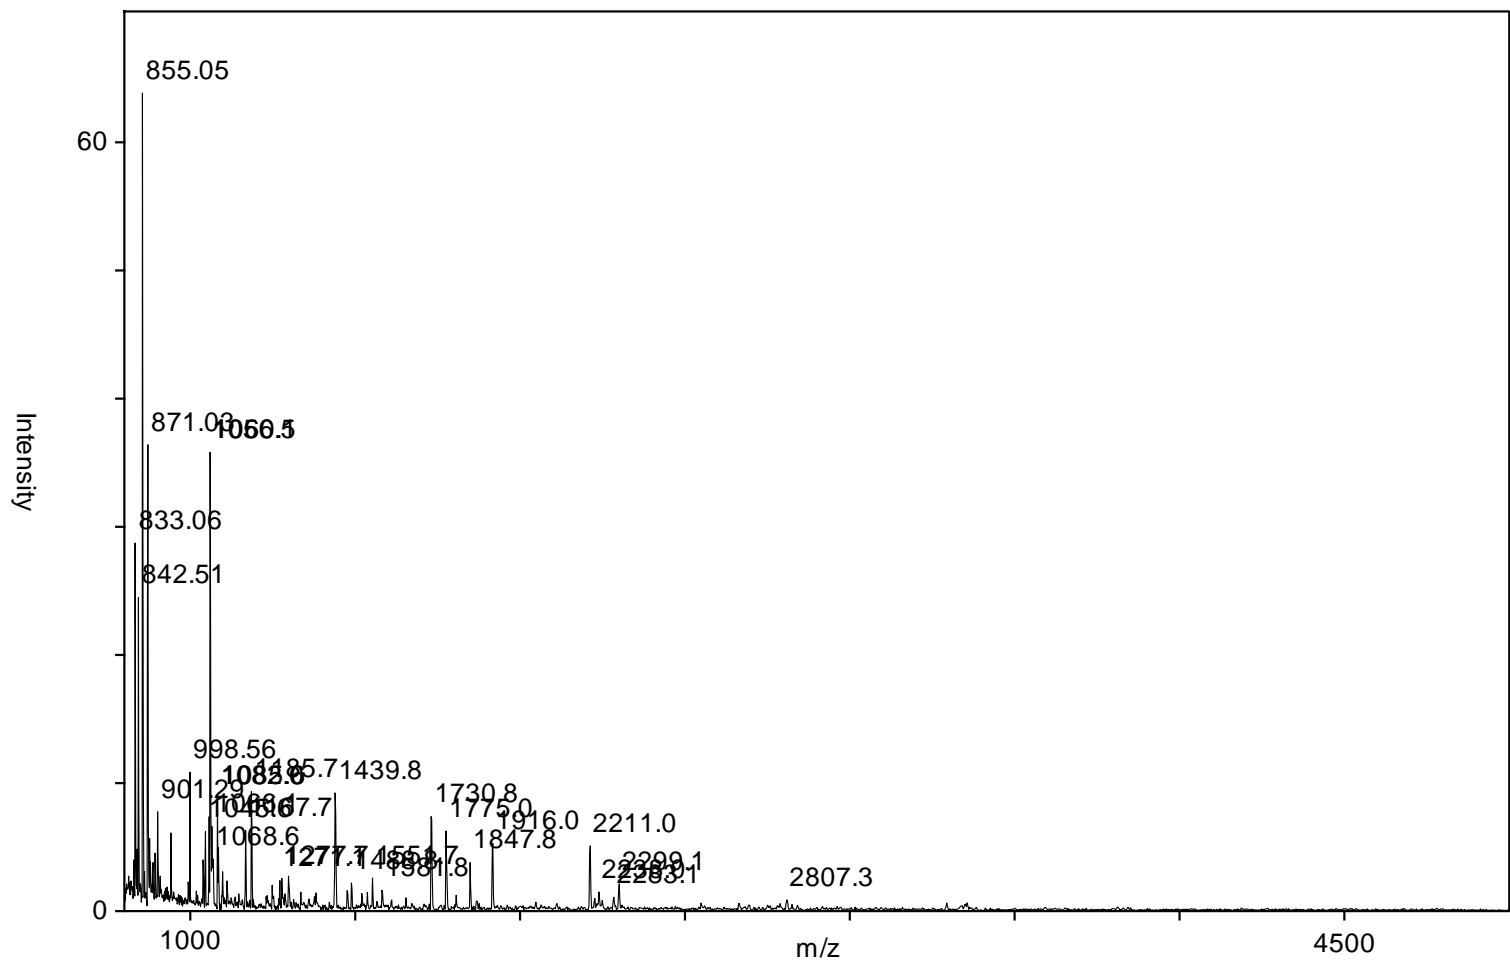

2D-BN-PAGE Spot 15: TC240105

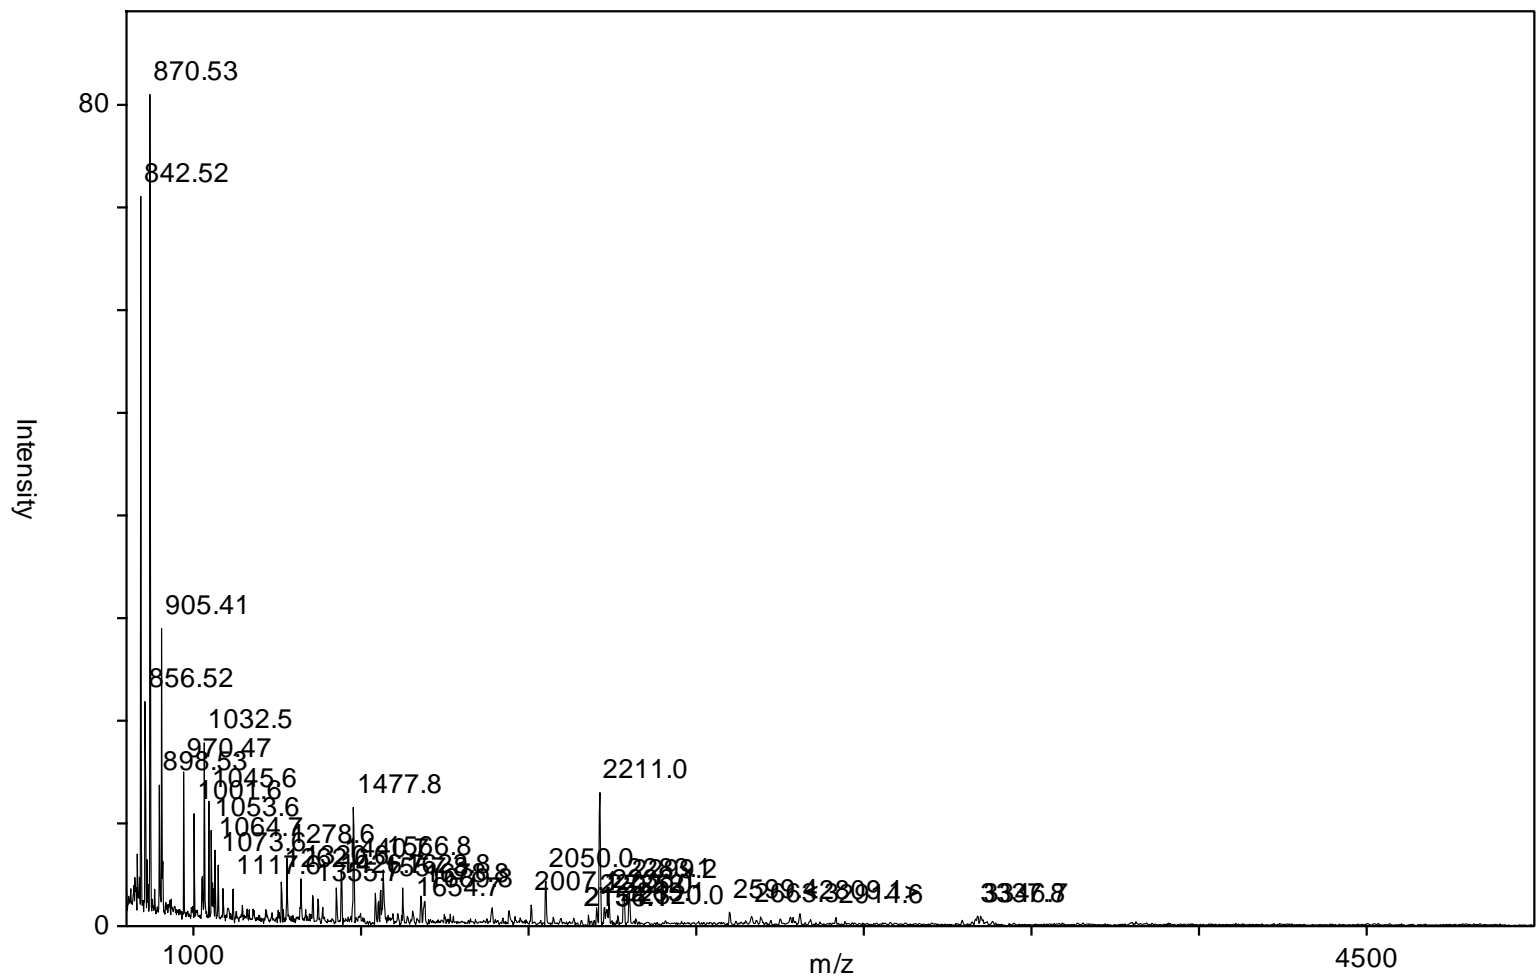

2D-BN-PAGE Spot 20; TC233444

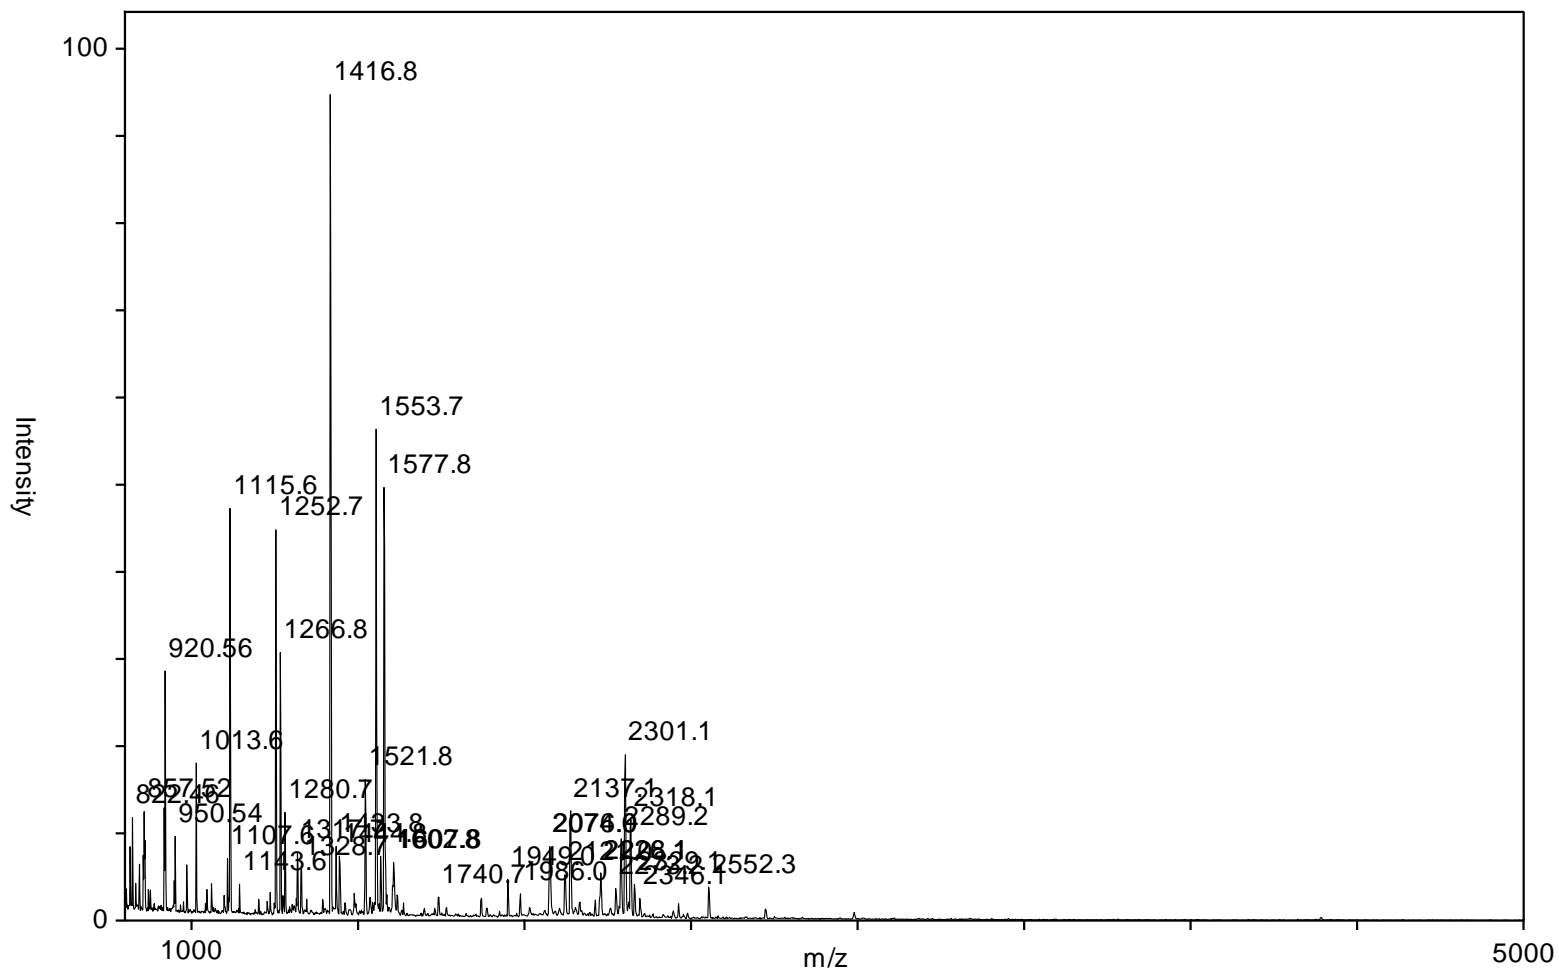

2D-BN-PAGE Spot 38; TC241926

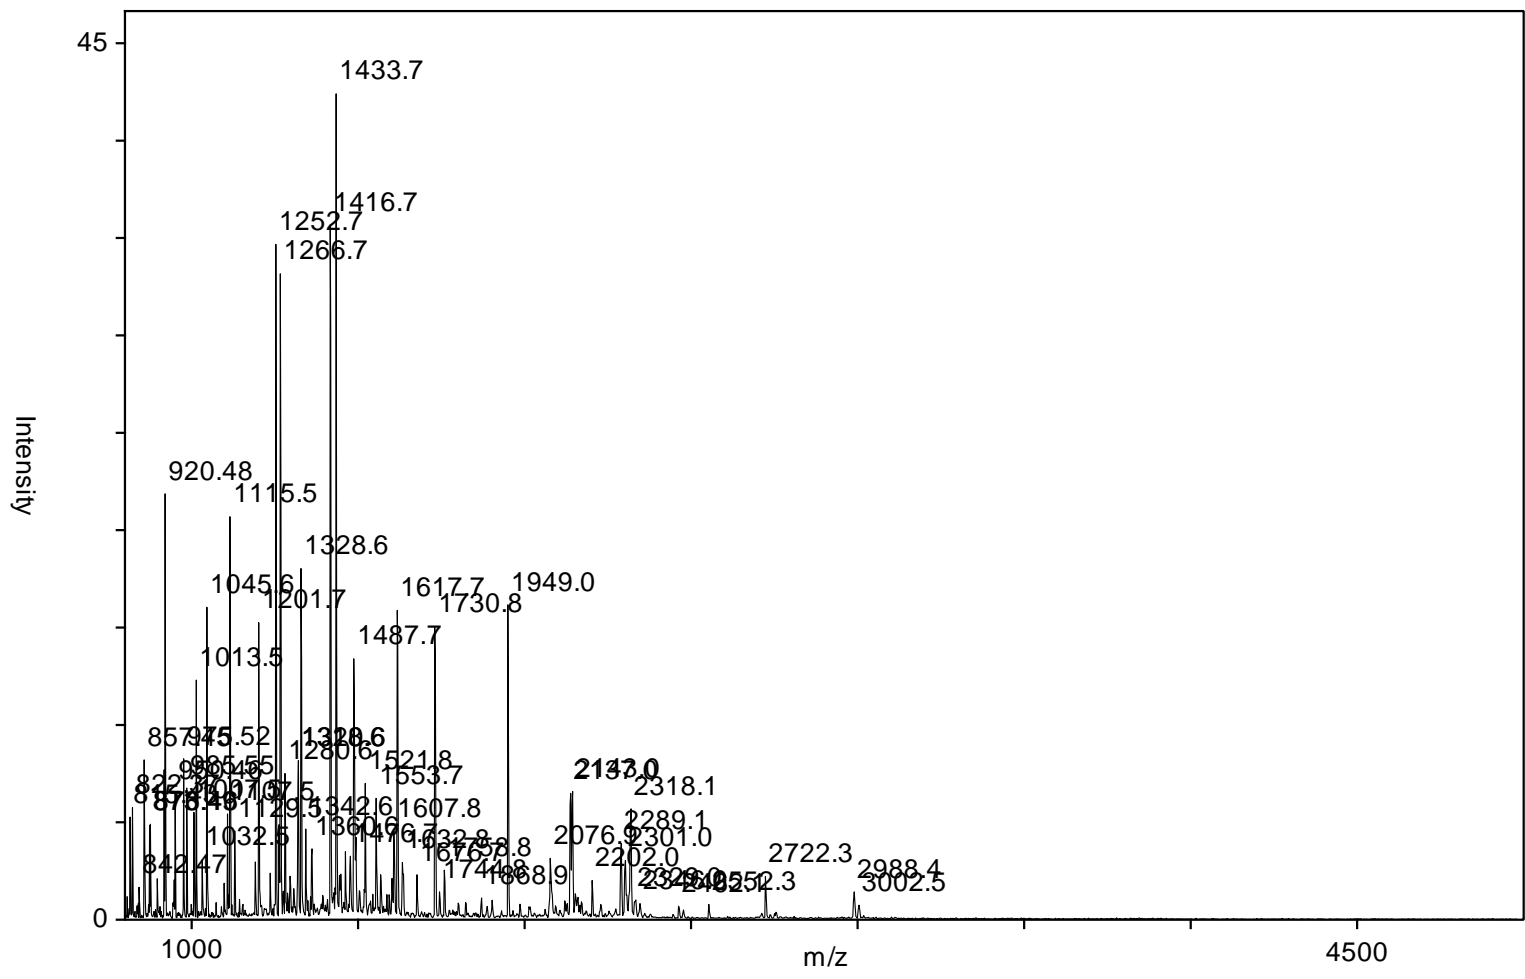

2D-BN-PAGE Spot 39: NP\_043032

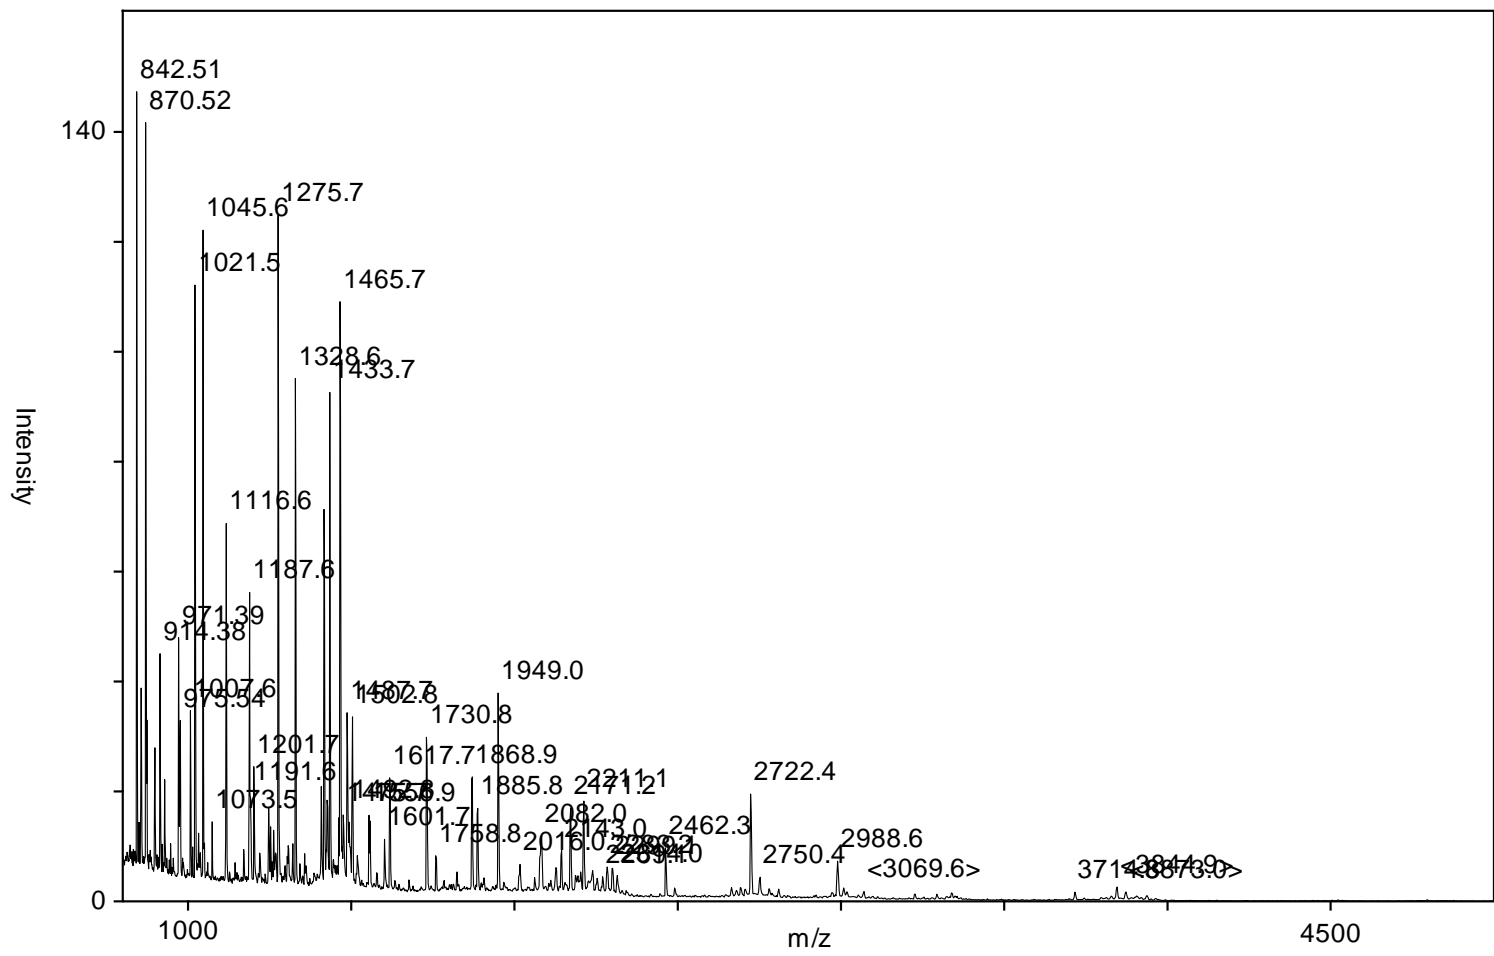

2D-BN-PAGE Spot 40: TC224055

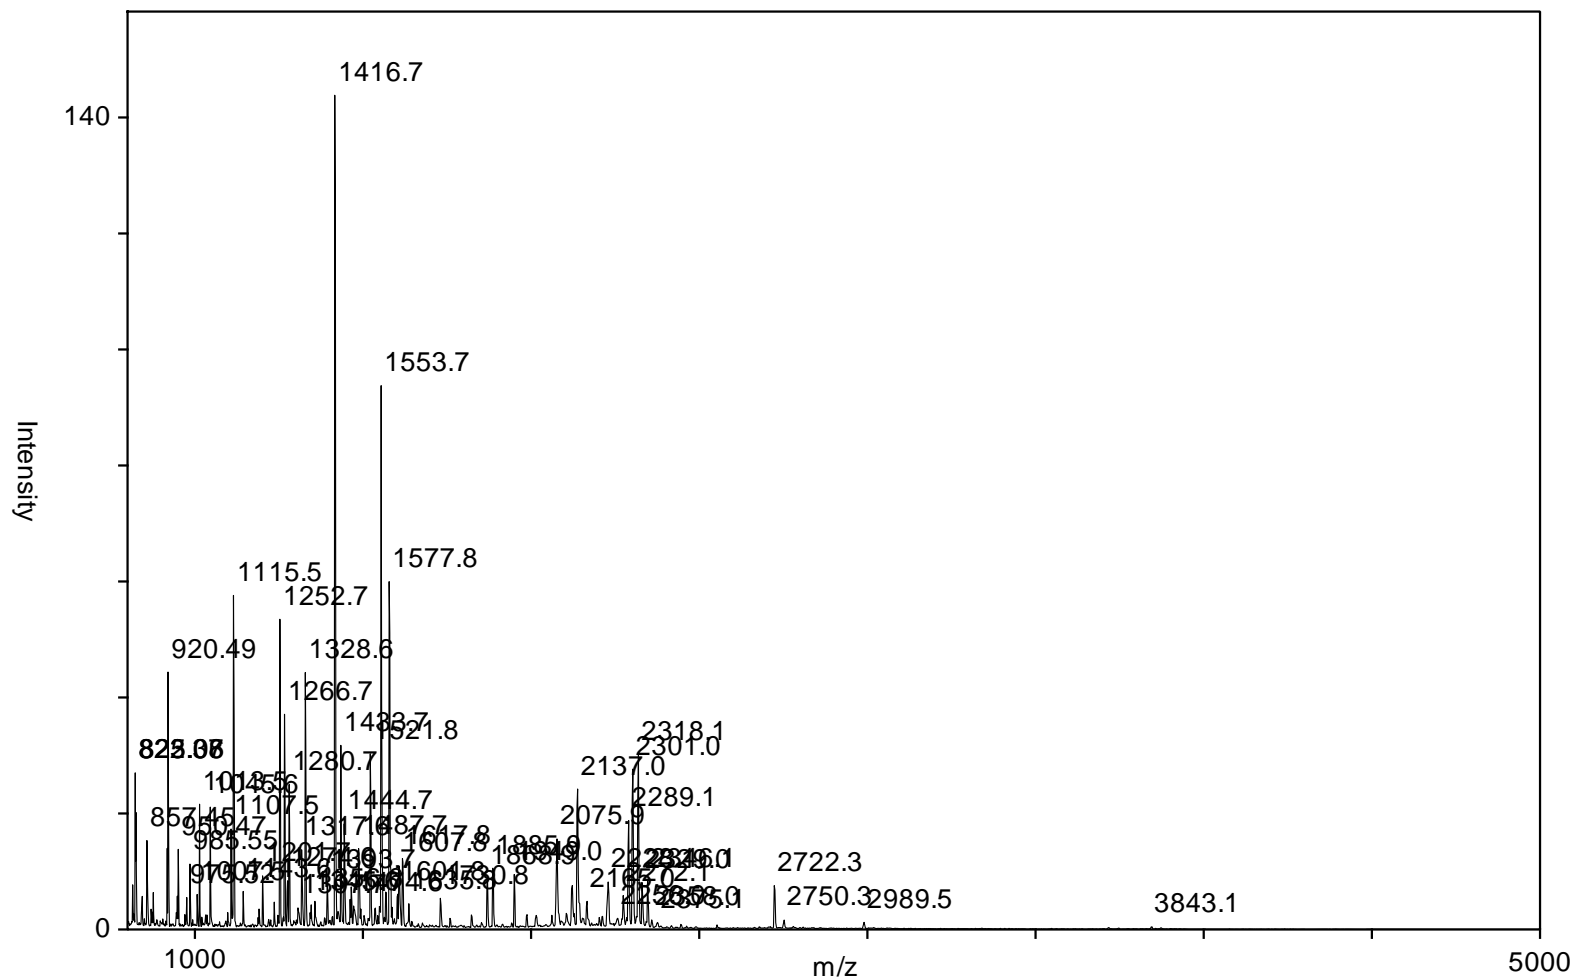

2D-BN-PAGE Spot 44: TC303520

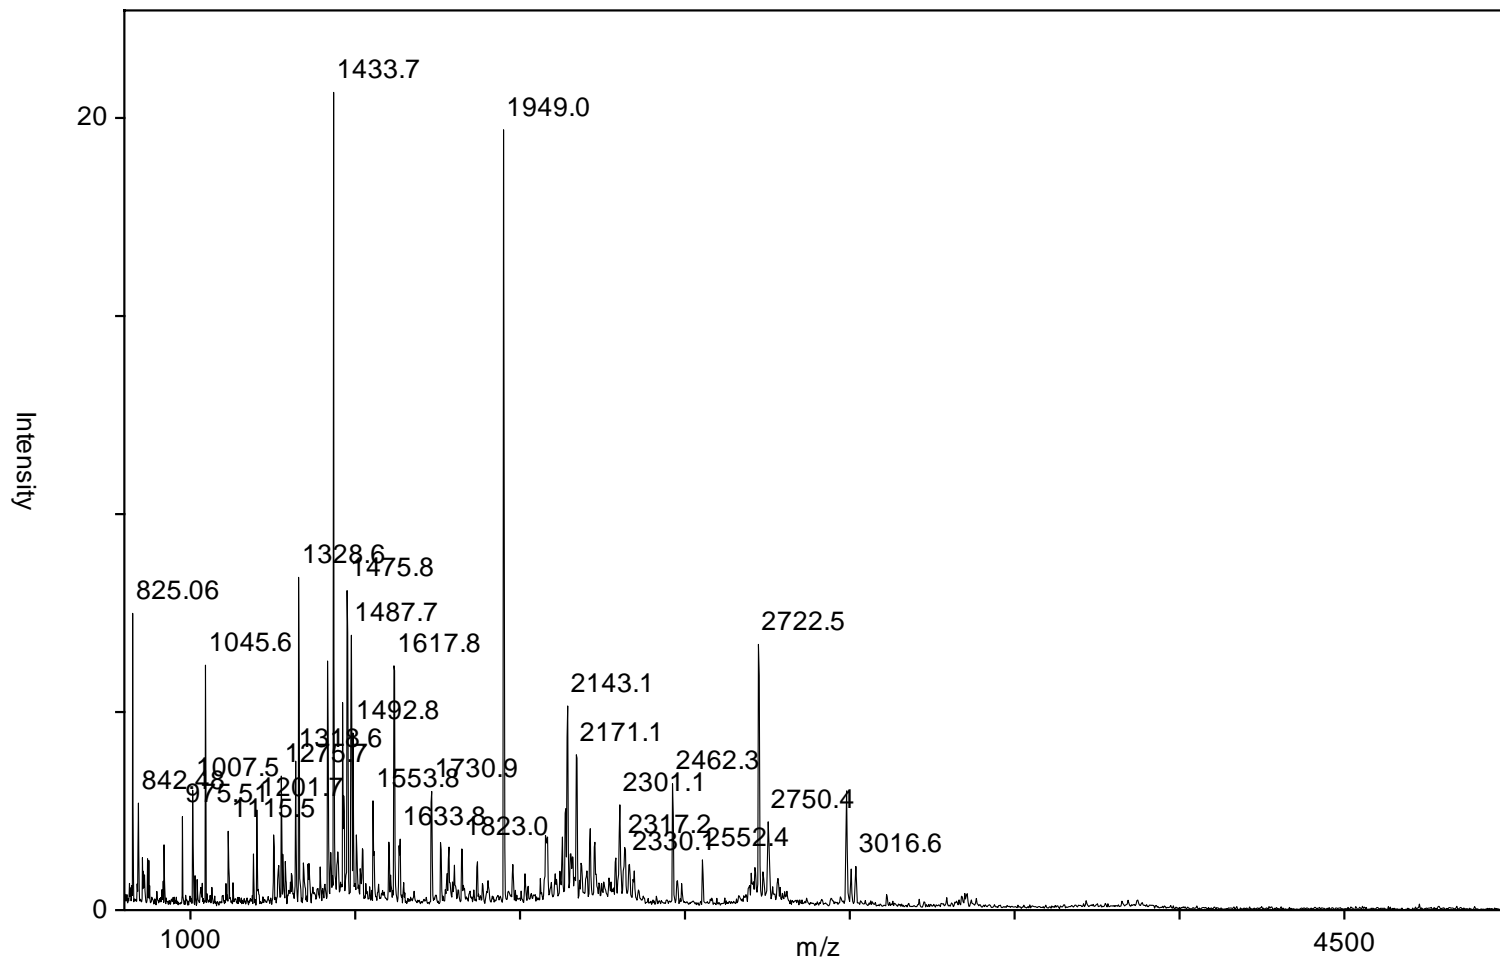

2D-BN-PAGE Spot 46: NP\_043032



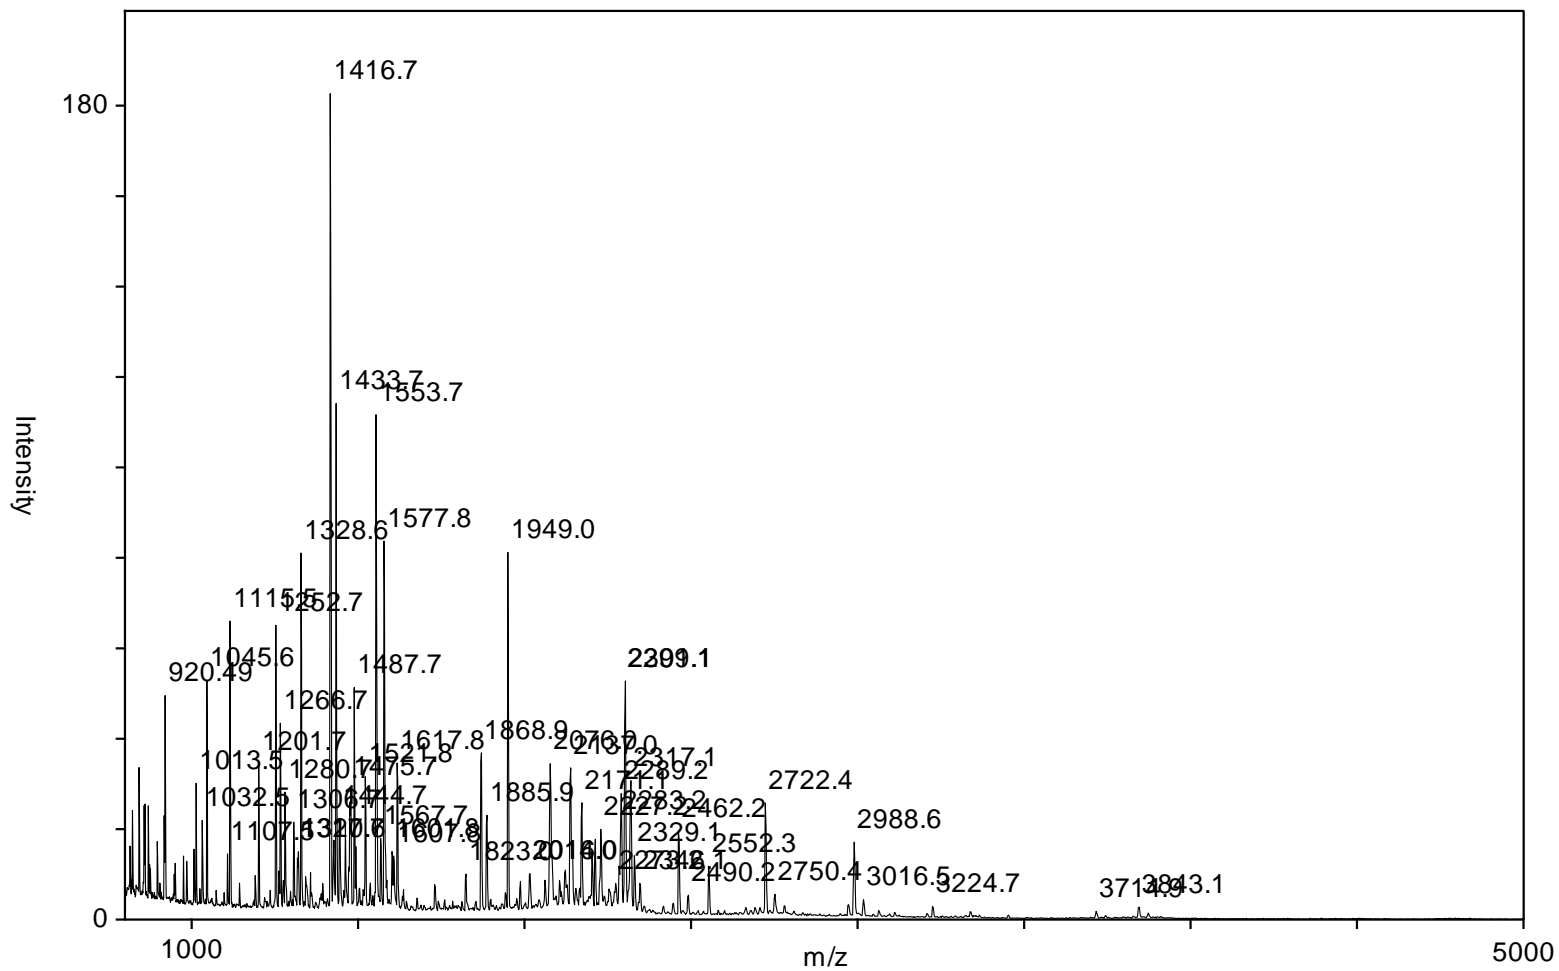

2D-BN-PAGE Spot 48: TC241926

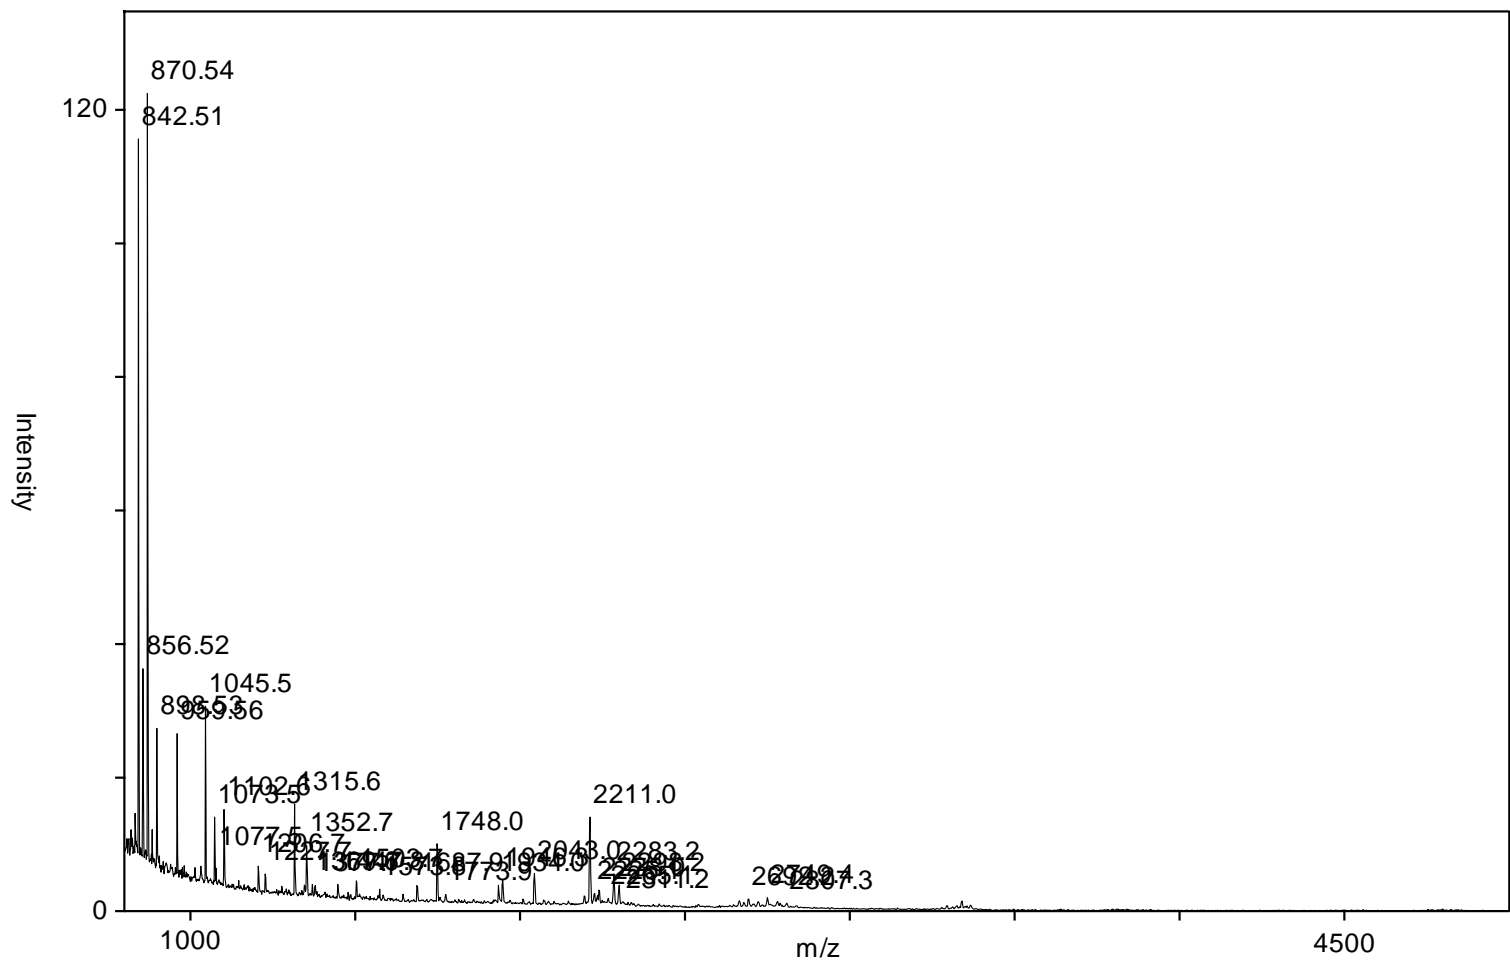

2D-BN-PAGE Spot 57: TC219625

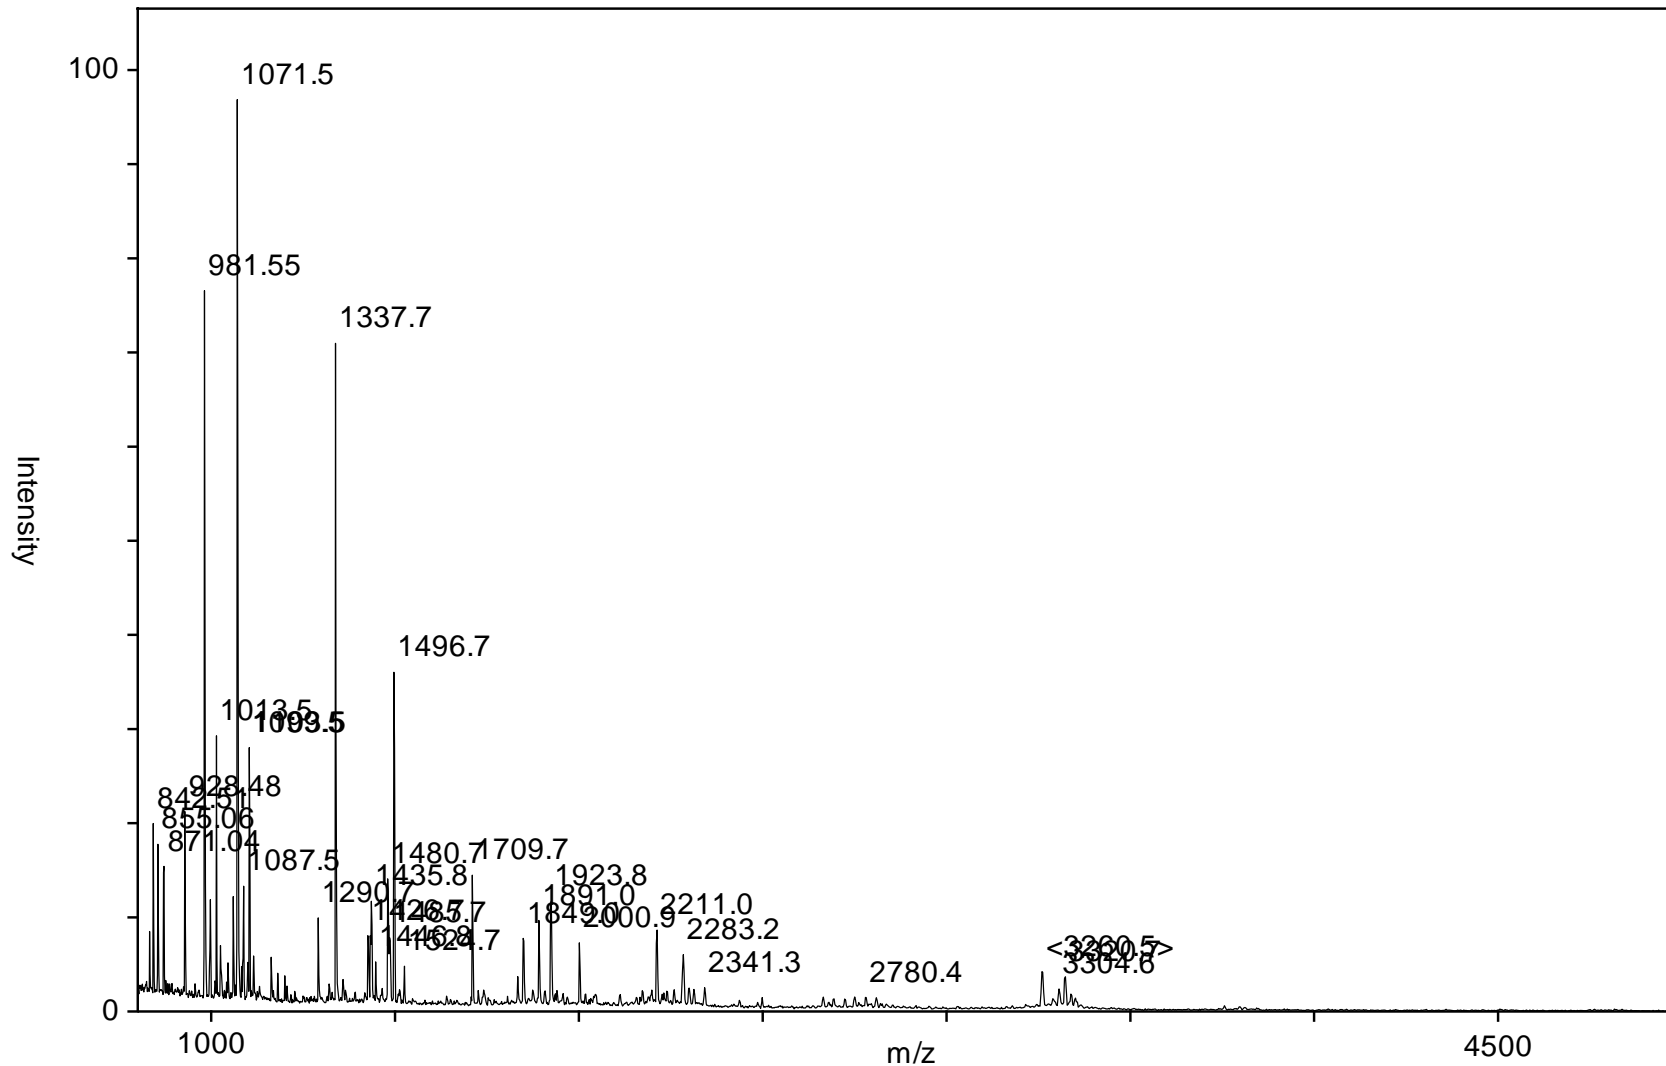

2D-BN-PAGE Spot 71: TC241707

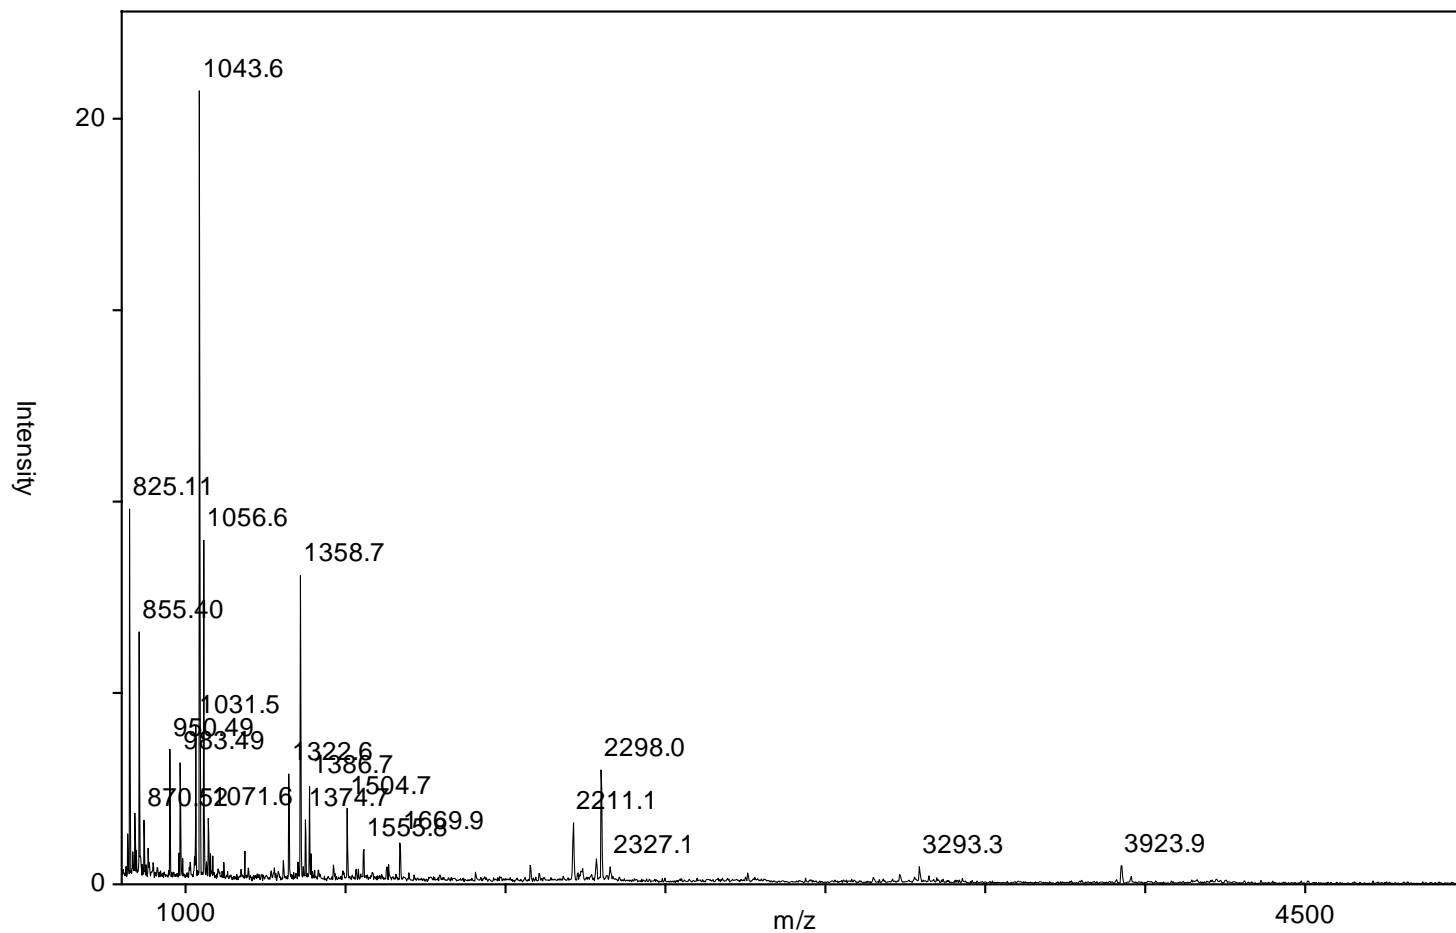

2D-BN-PAGE Spot 74: TC287102

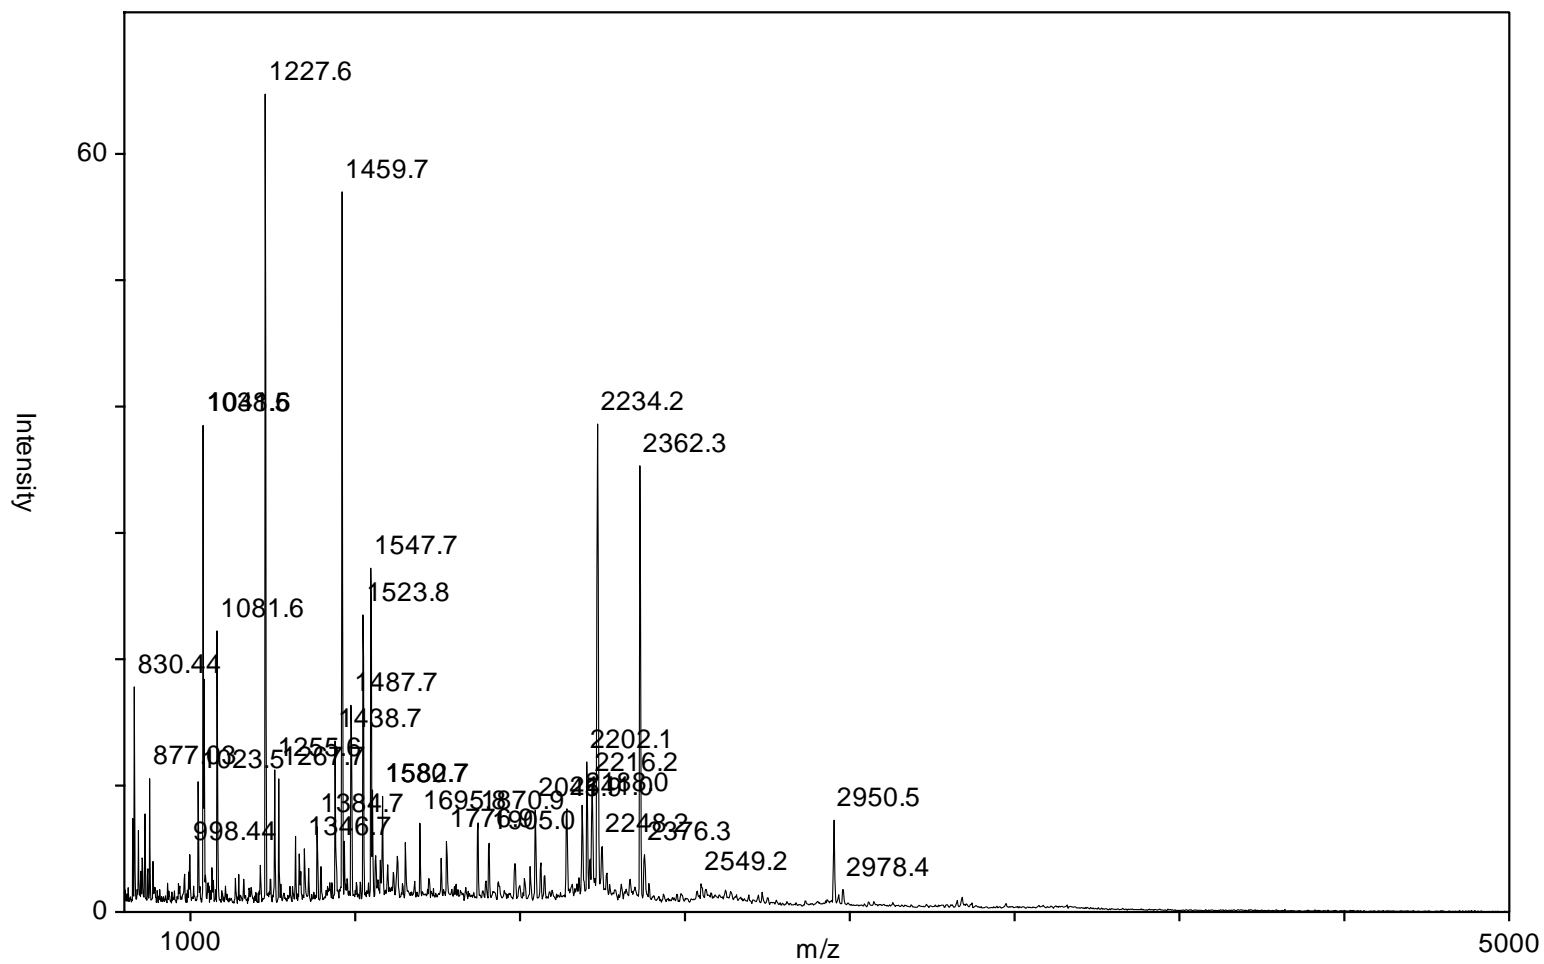

2D-BN-PAGE Spot 78: NP\_043037

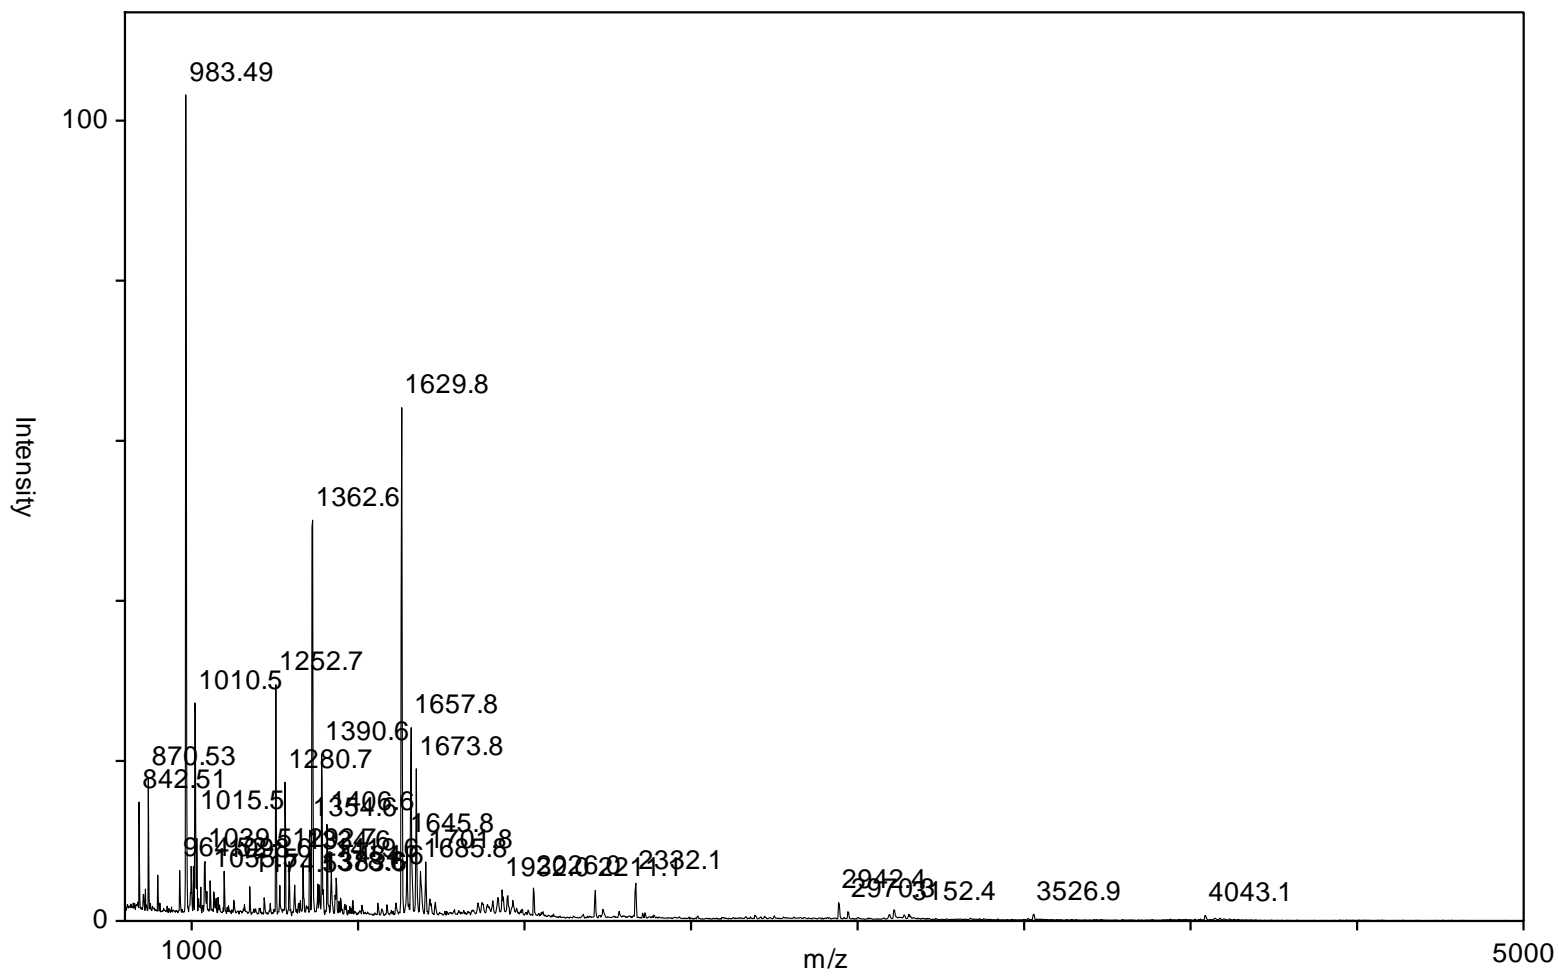

2D-BN-PAGE Spot 93: TC299123

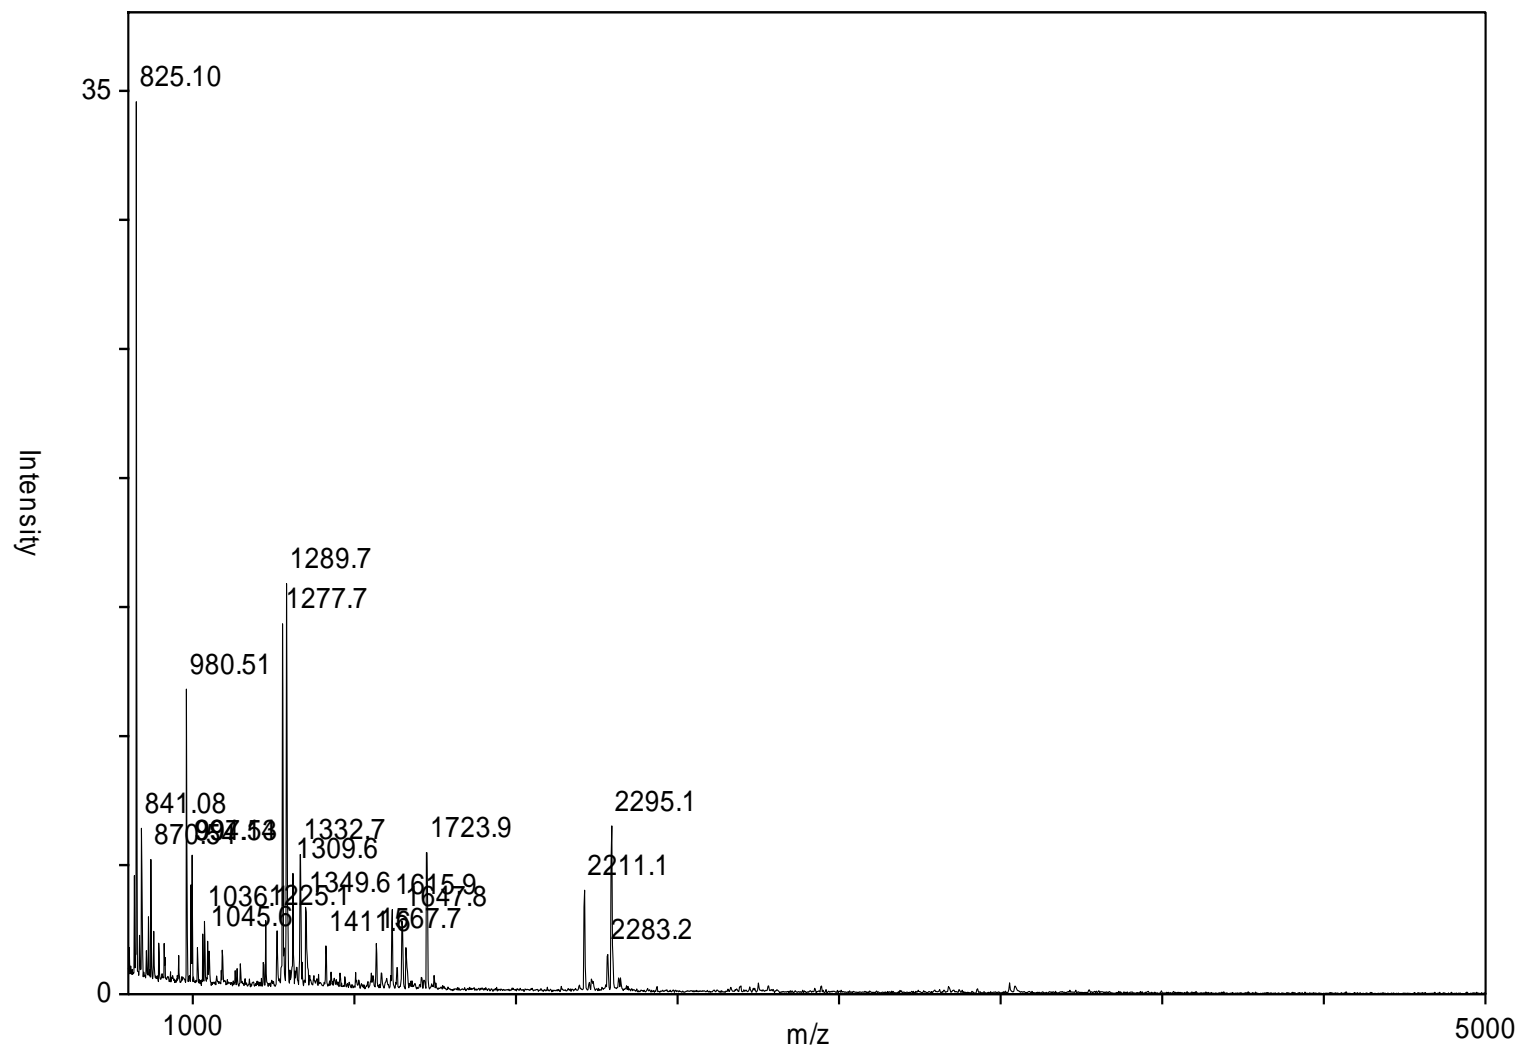

2D-BN-PAGE Spot 95: TC286618

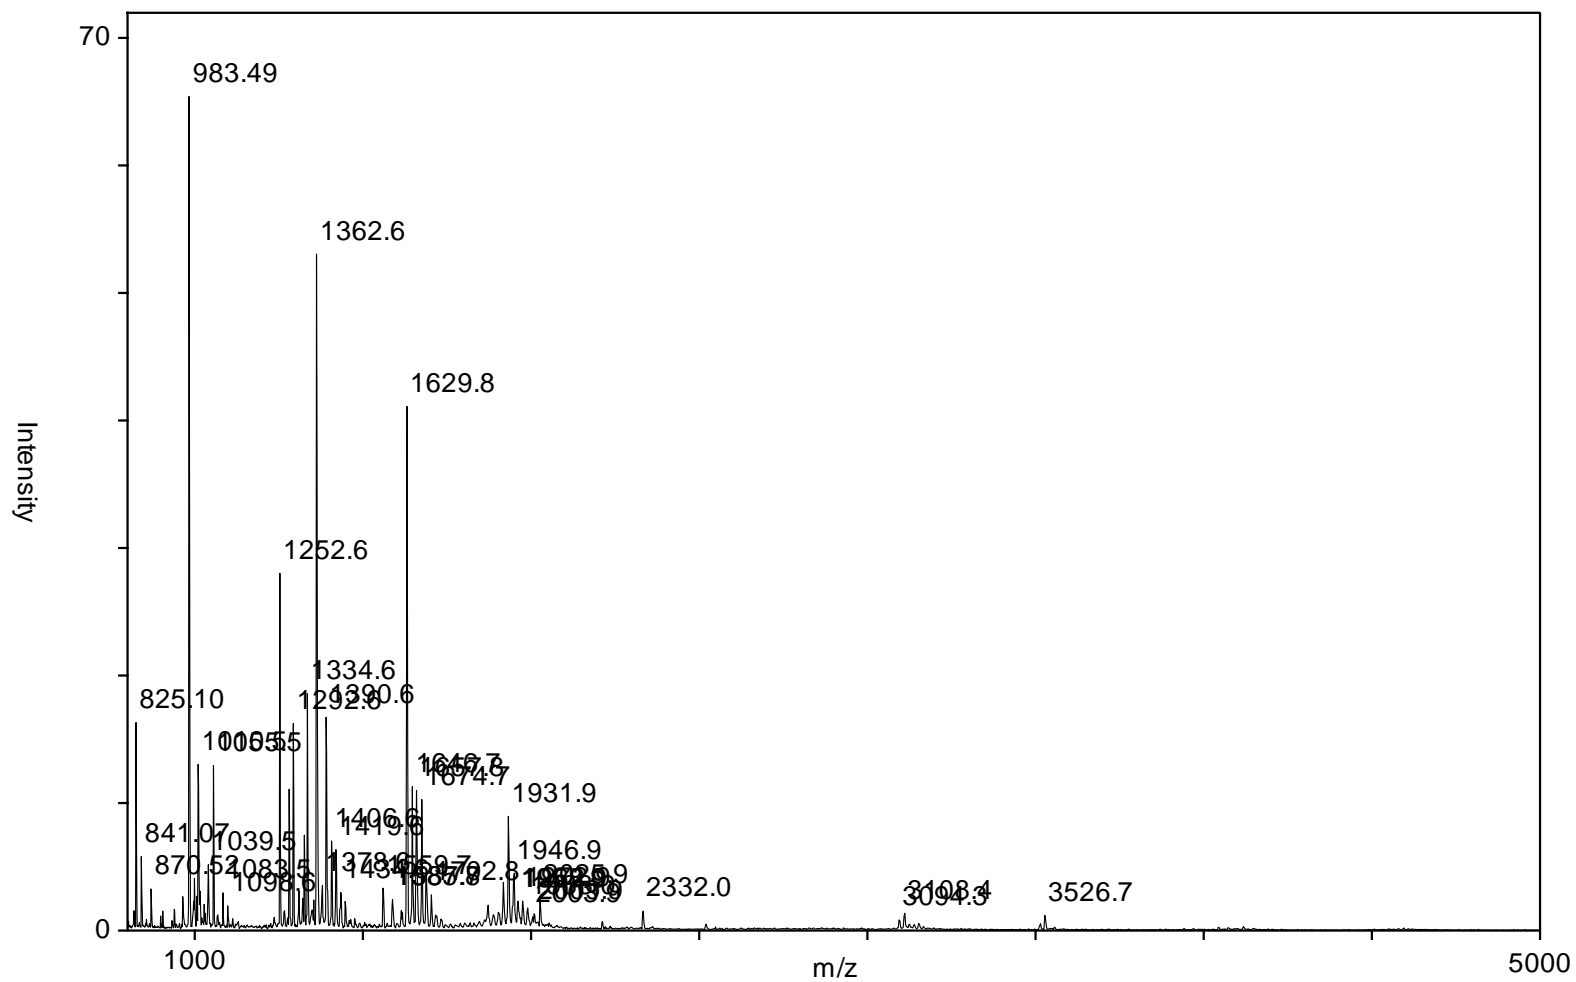

2D-BN-PAGE Spot 96: TC286602





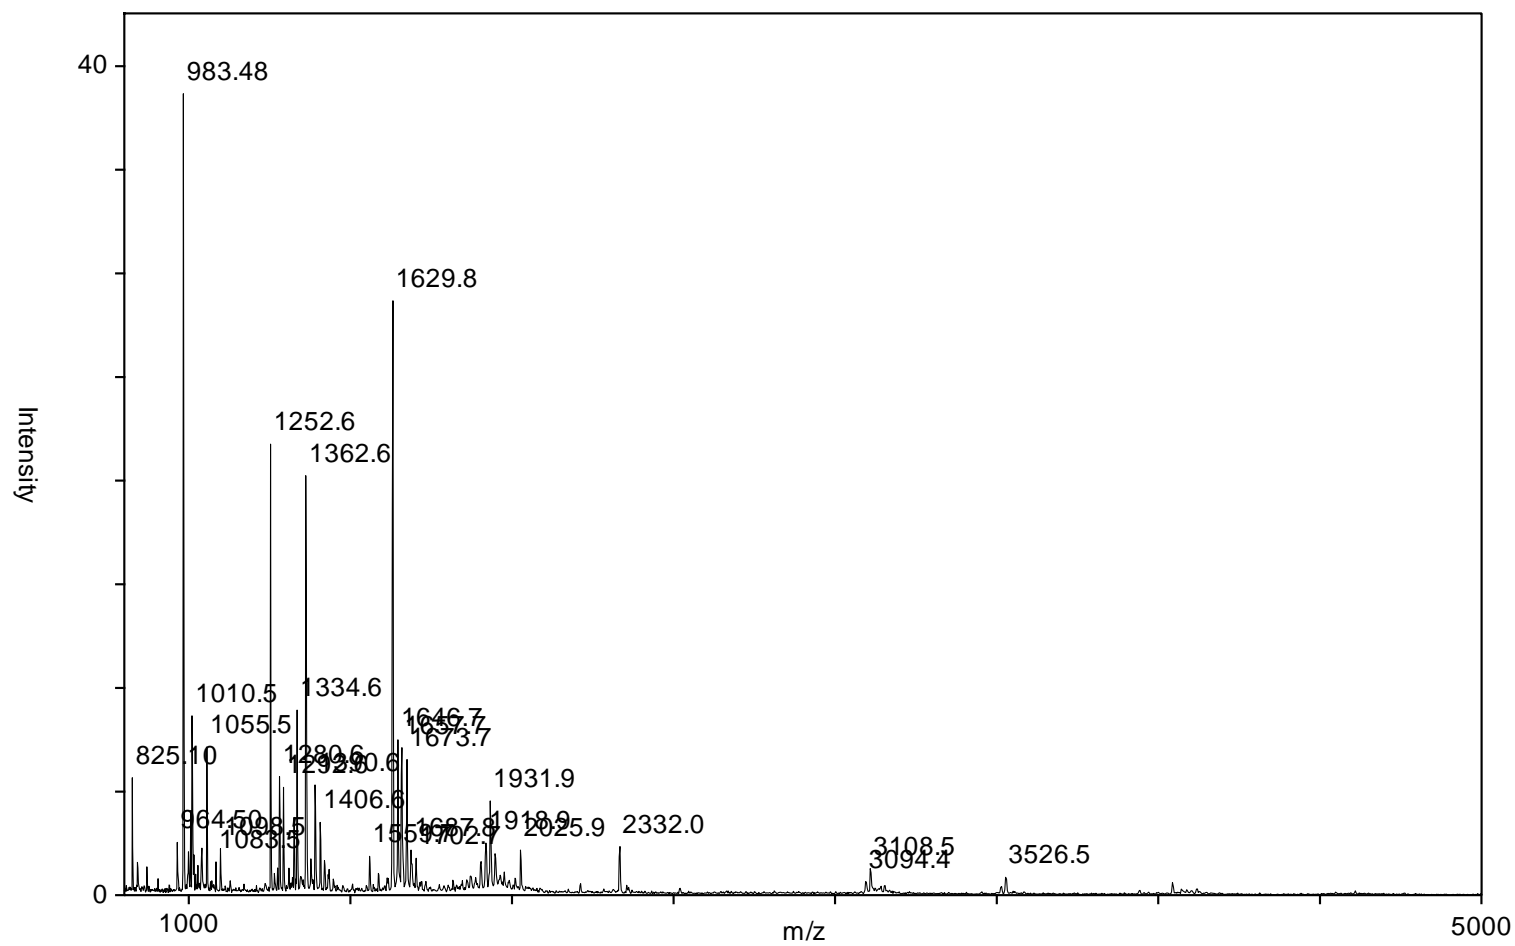

2D-BN-PAGE Spot 98: TC299123

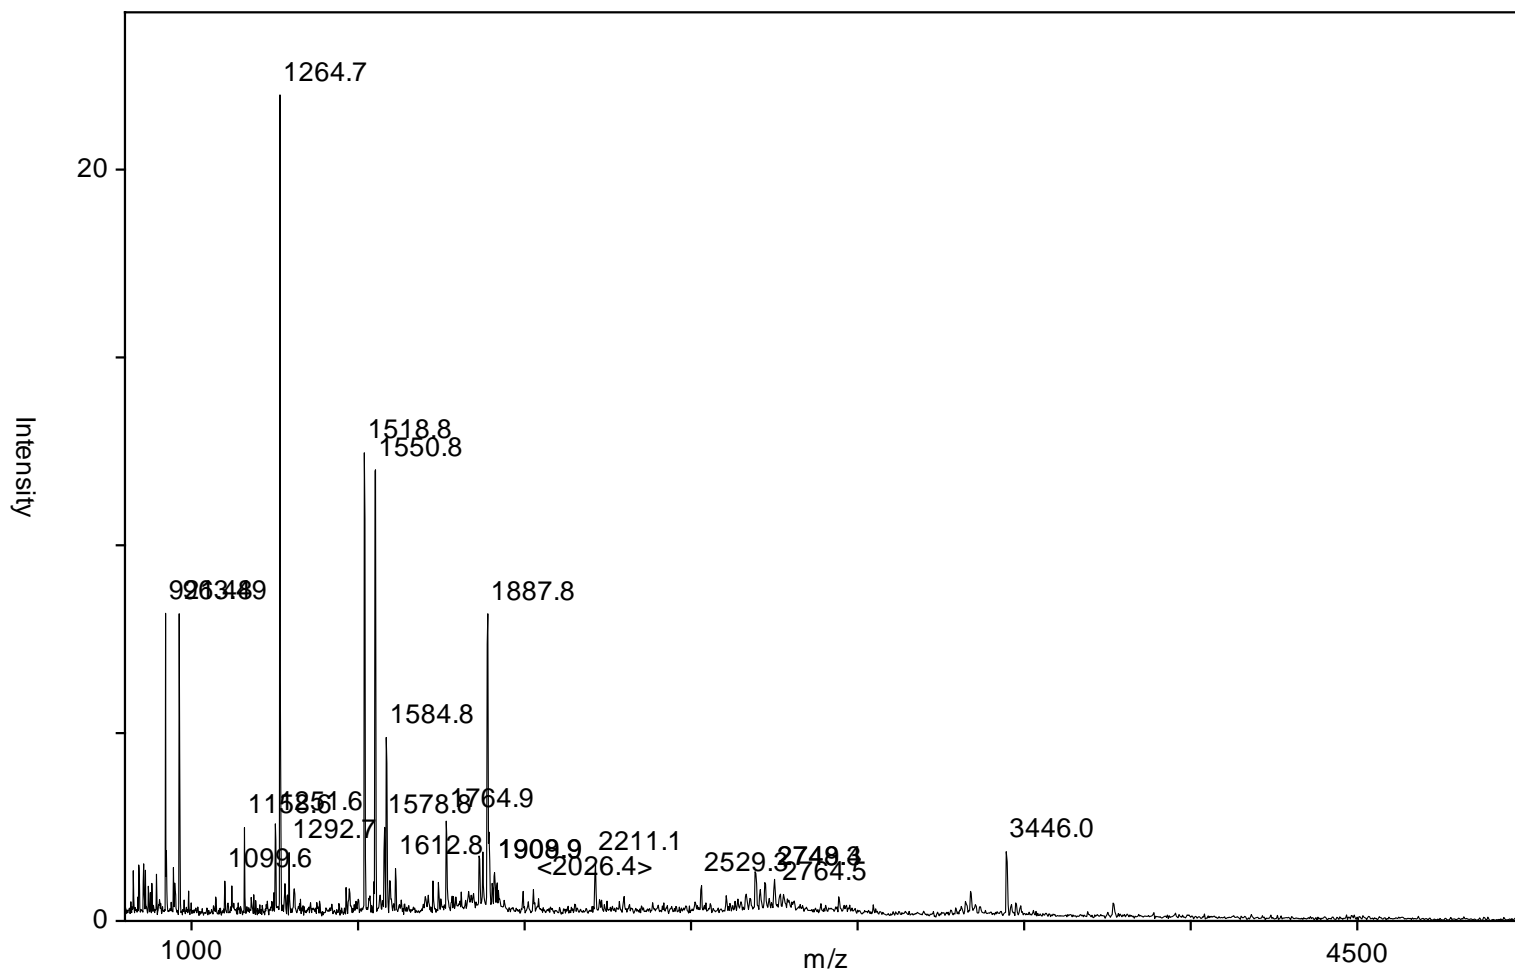

2D-BN-PAGE Spot 101: TC300425

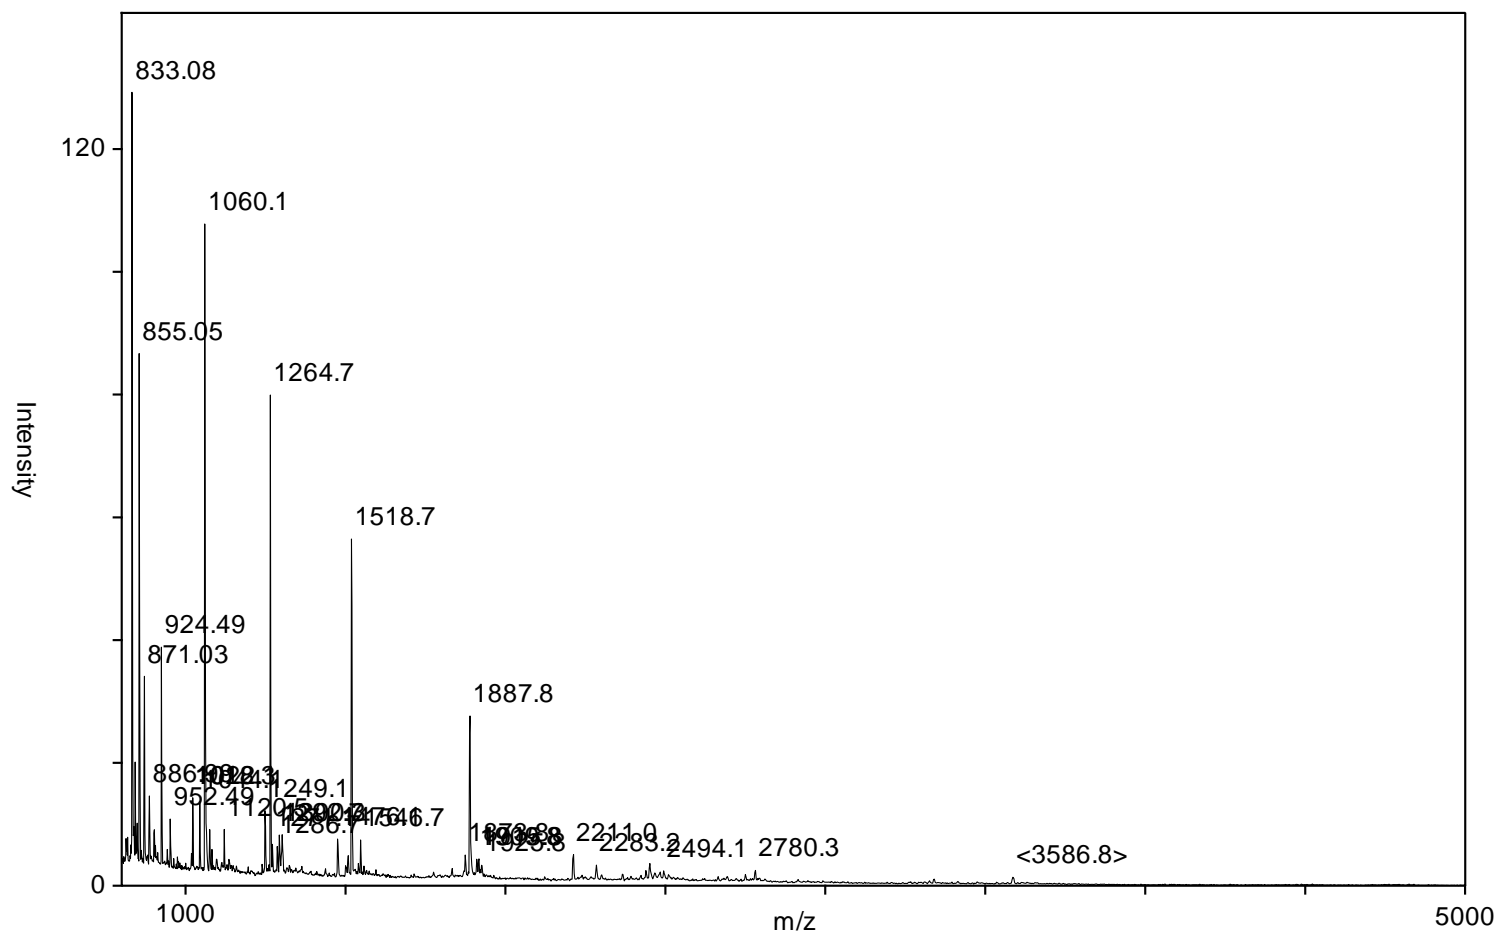

2D-BN-PAGE Spot 110: TC236592

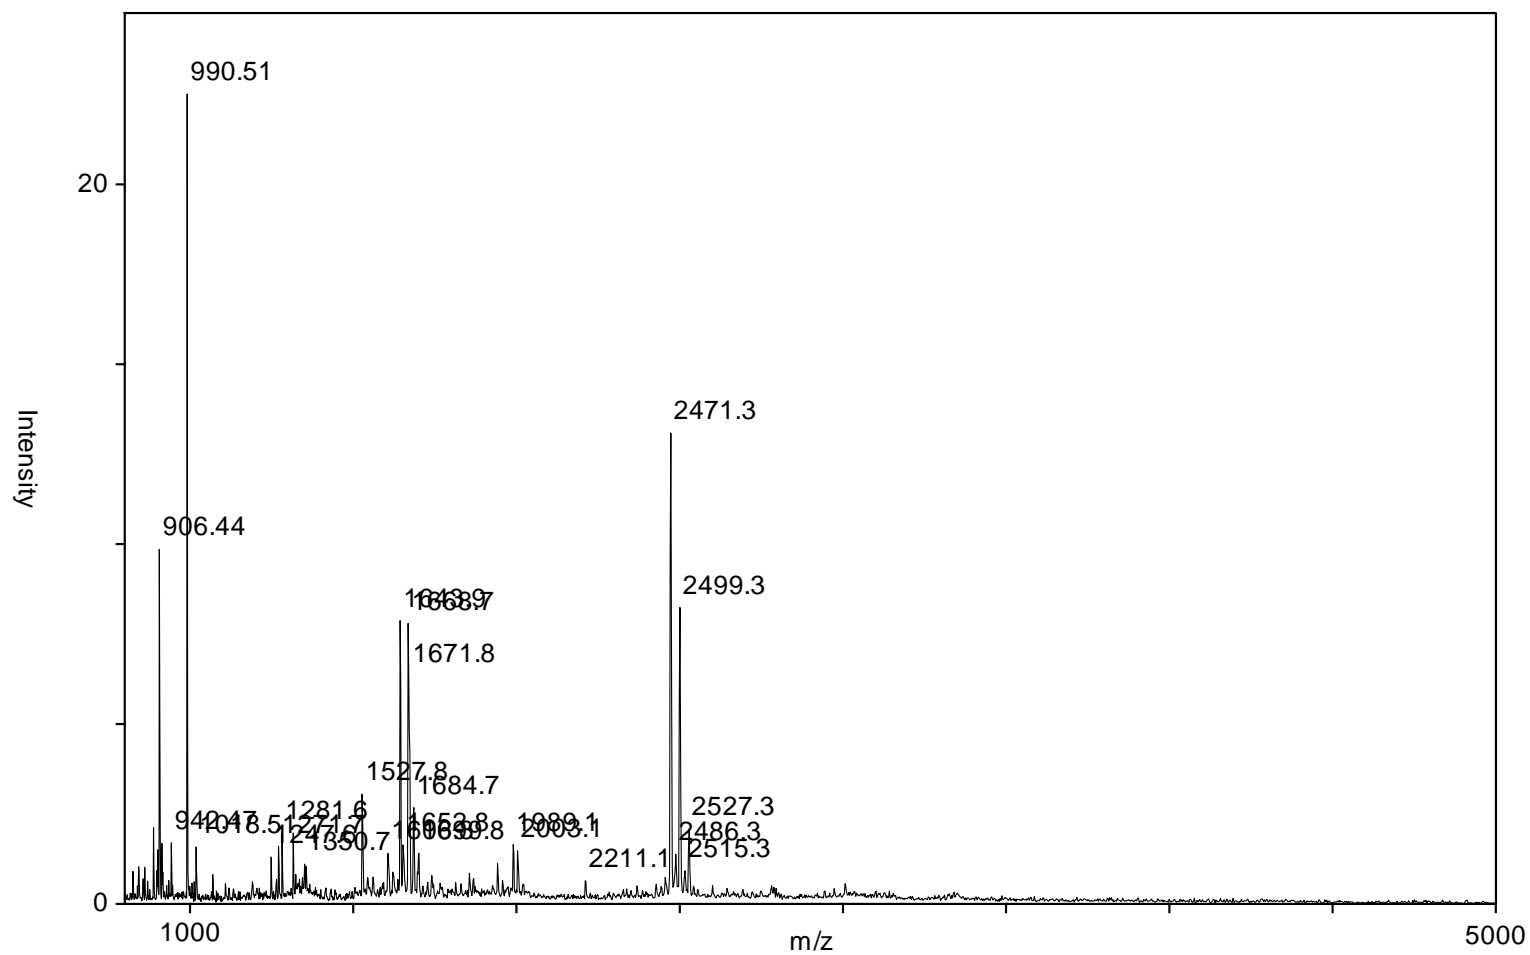

2D-BN-PAGE Spot 112: TC293201

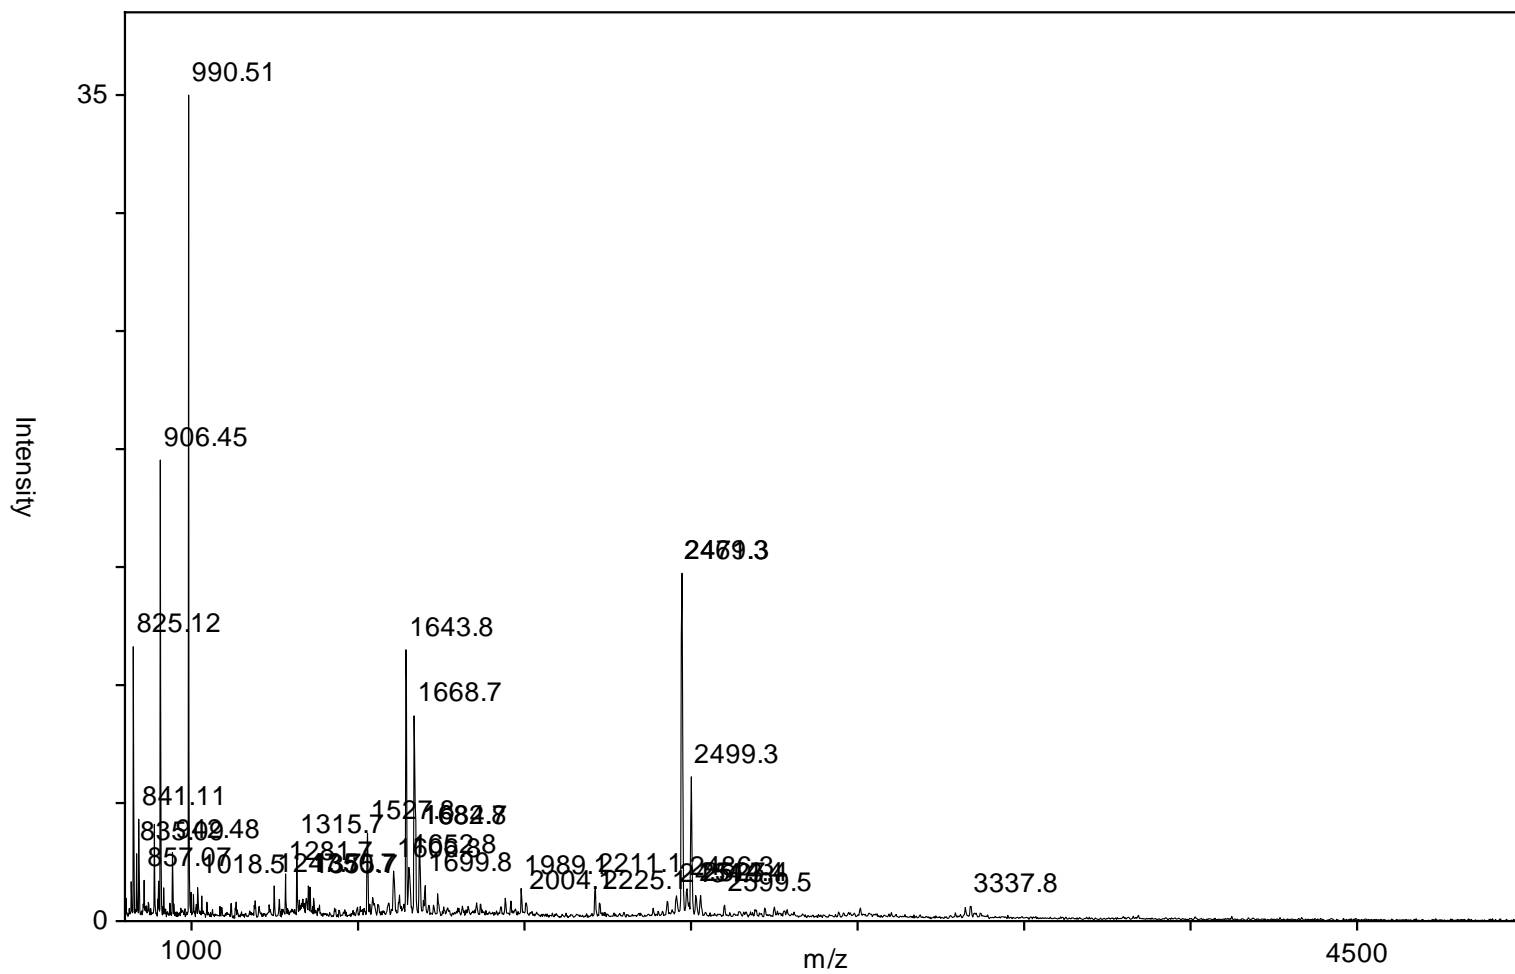

2D-BN-PAGE Spot 113: TC293201

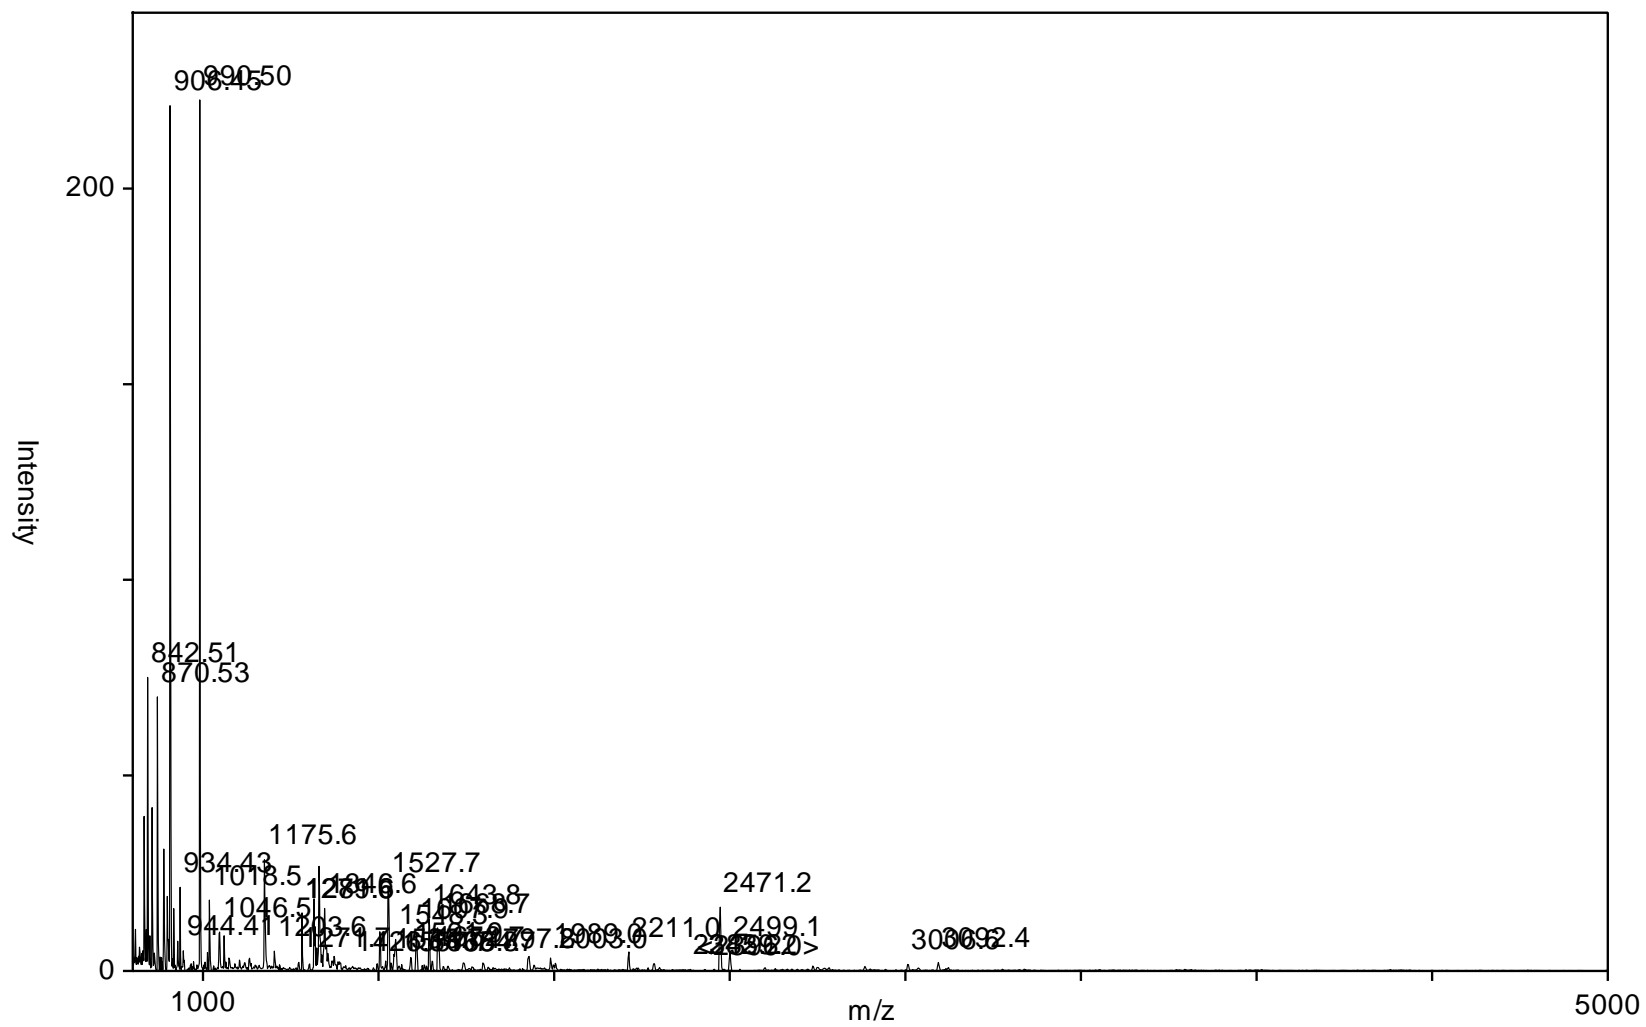

2D-BN-PAGE Spot 114: TC235538

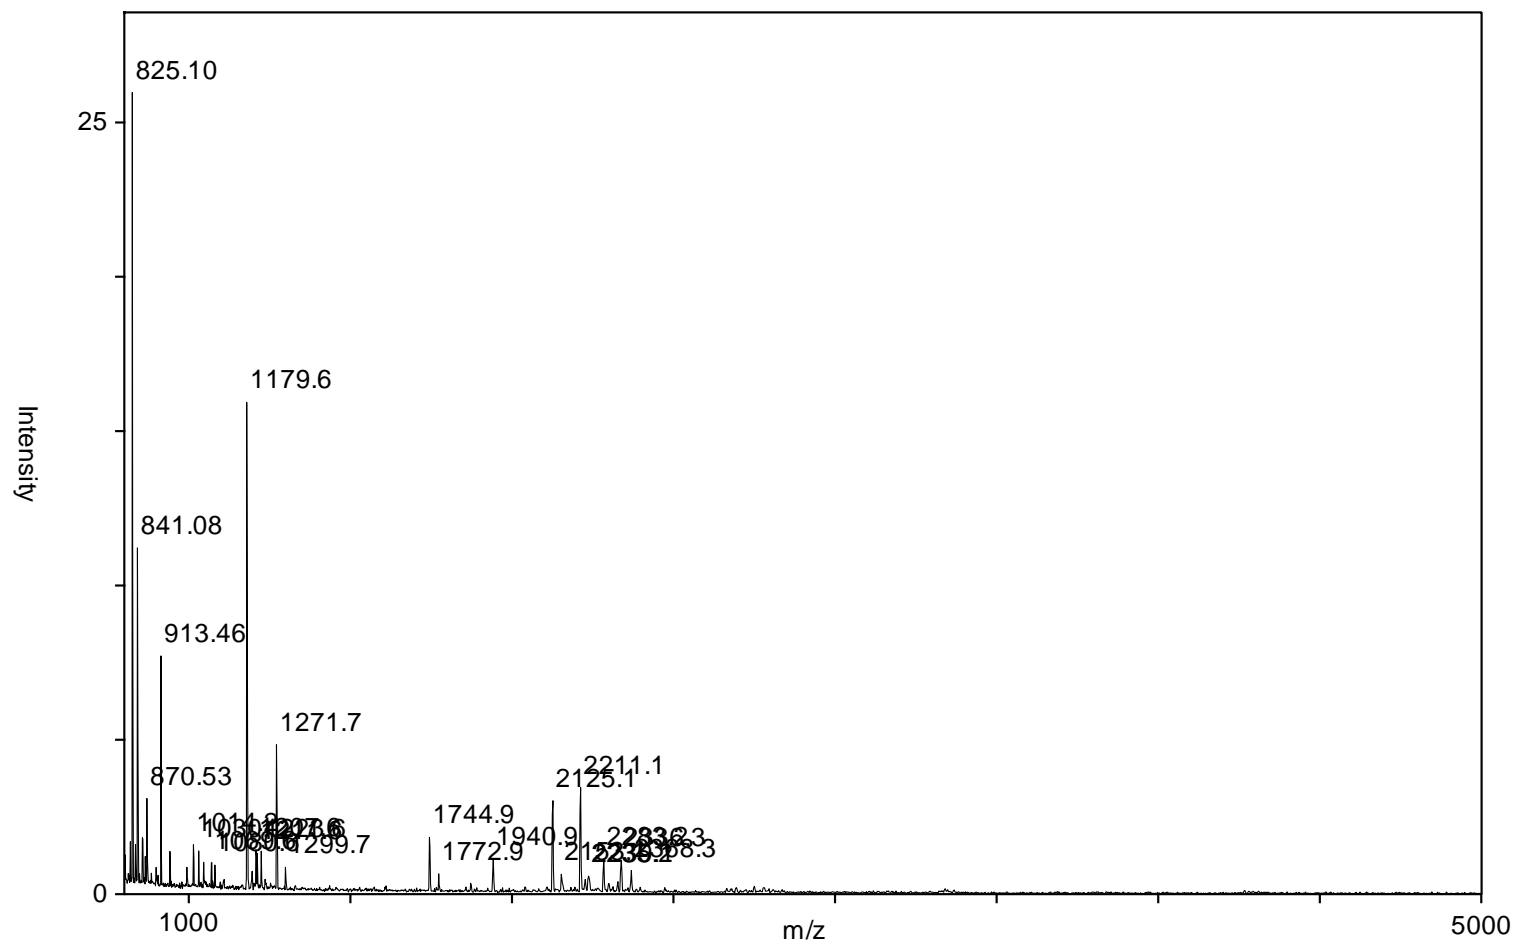

2D-BN-PAGE Spot 122: TC299206



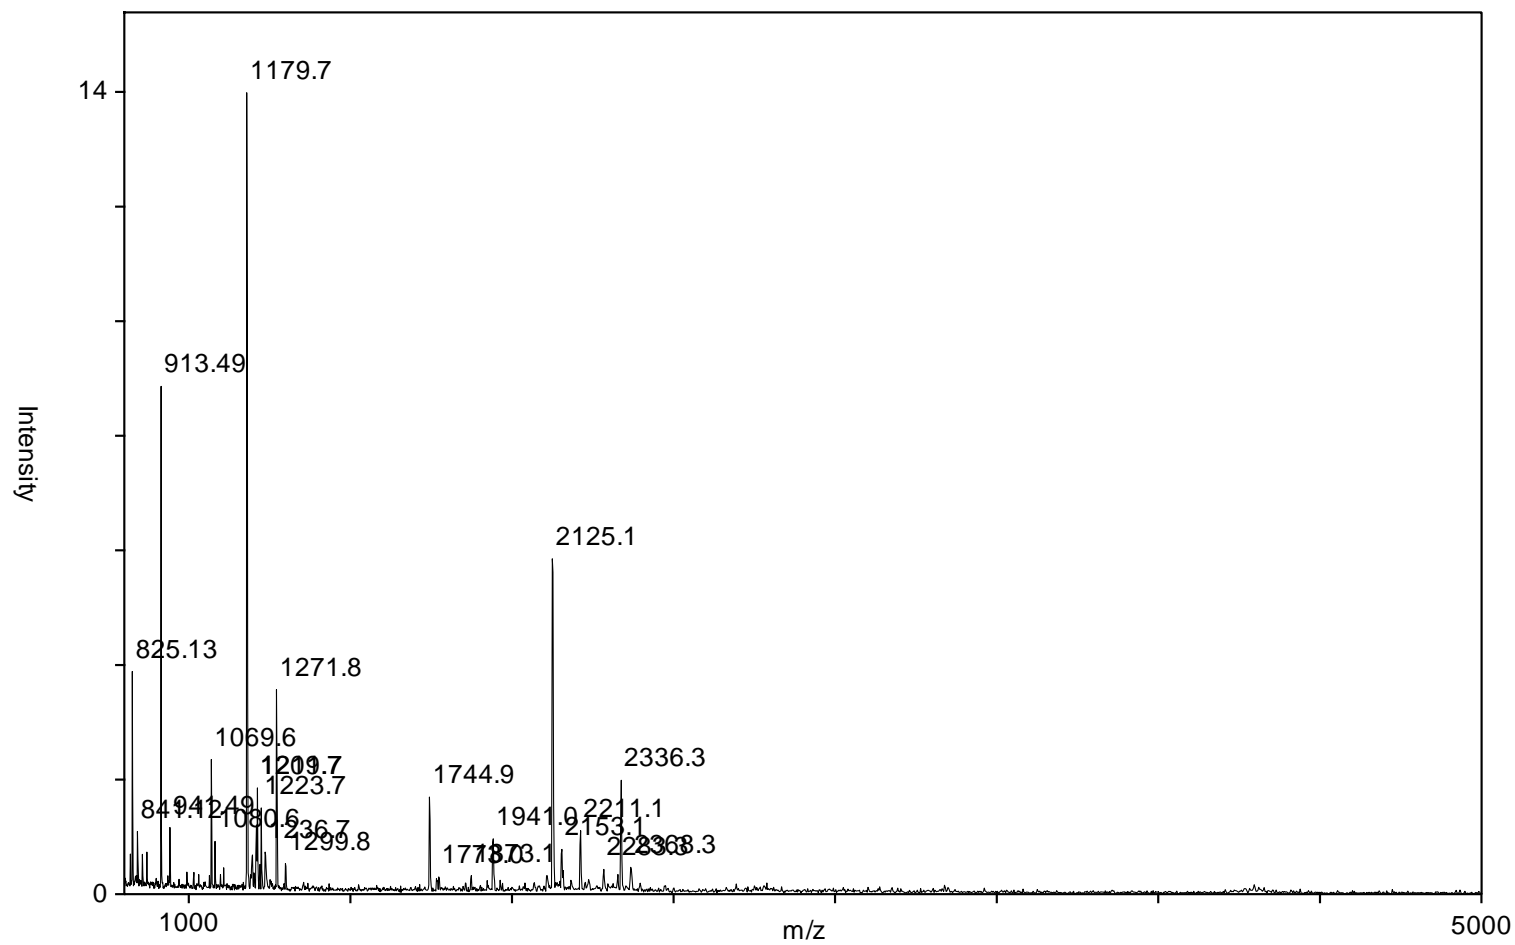

2D-BN-PAGE Spot 124: TC299208

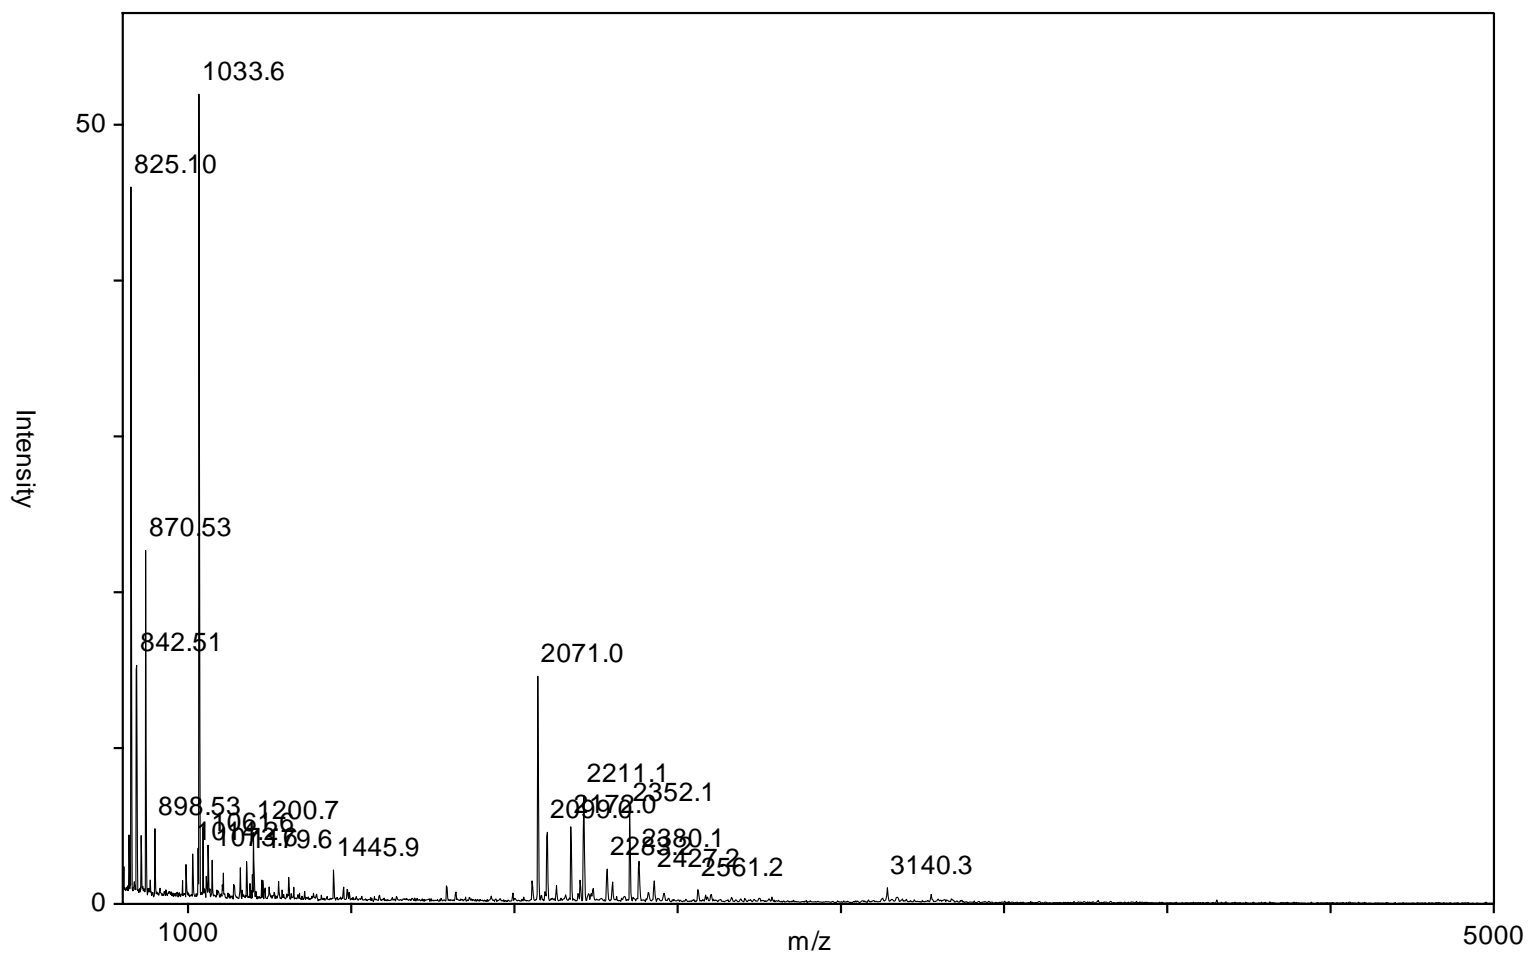

2D-BN-PAGE Spot 129: TC279867

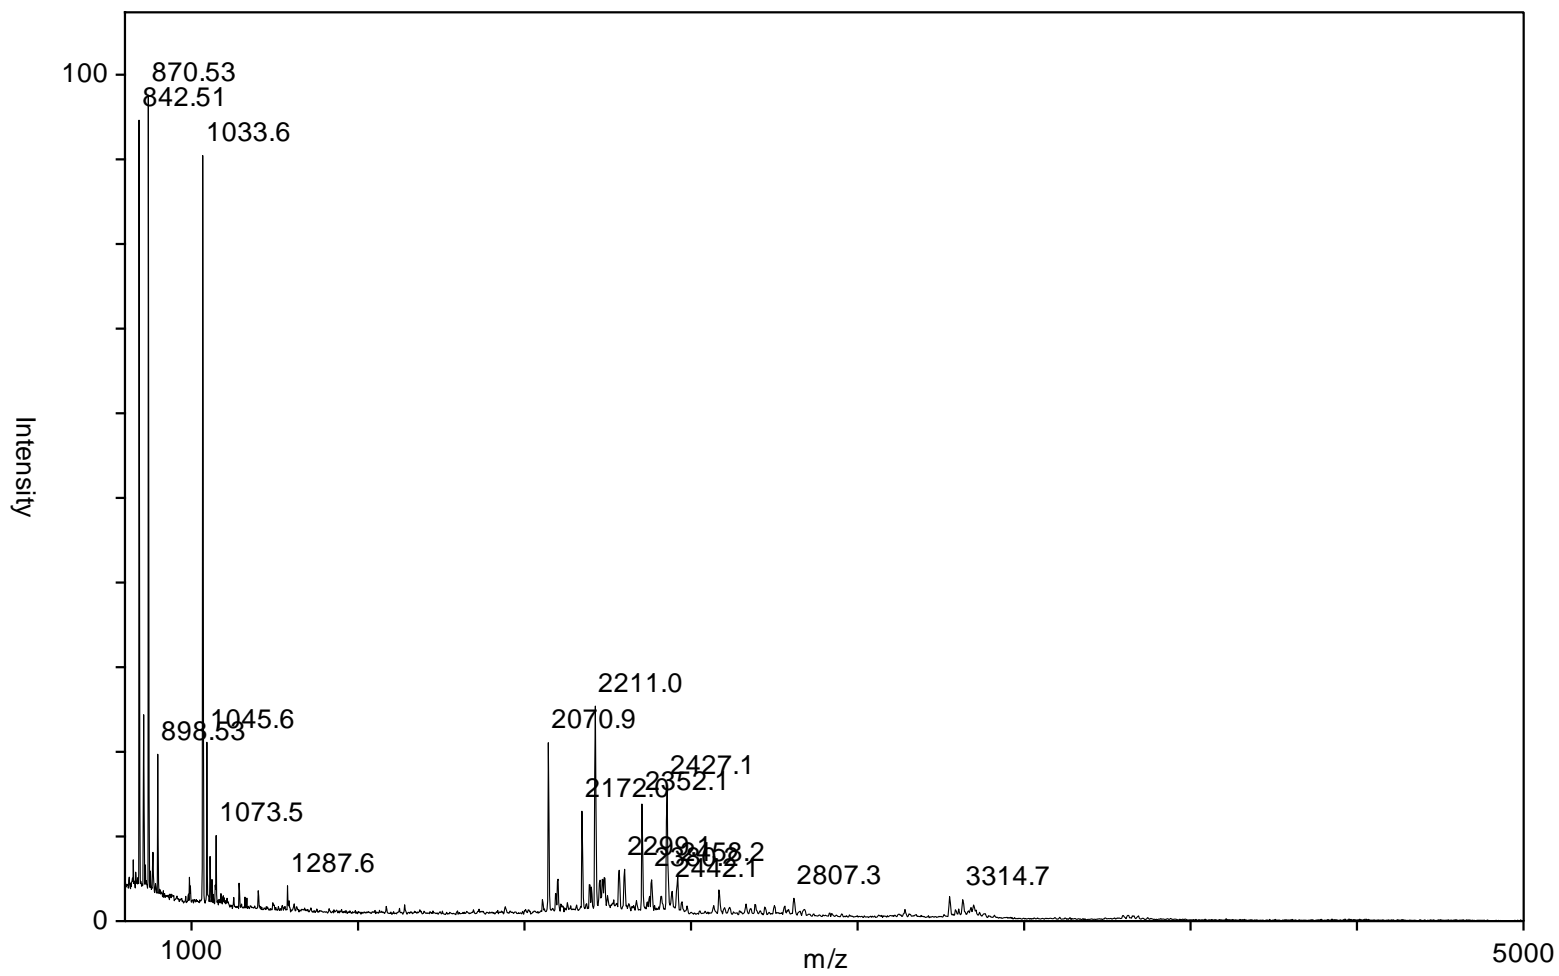

2D-BN-PAGE Spot 130: TC218606

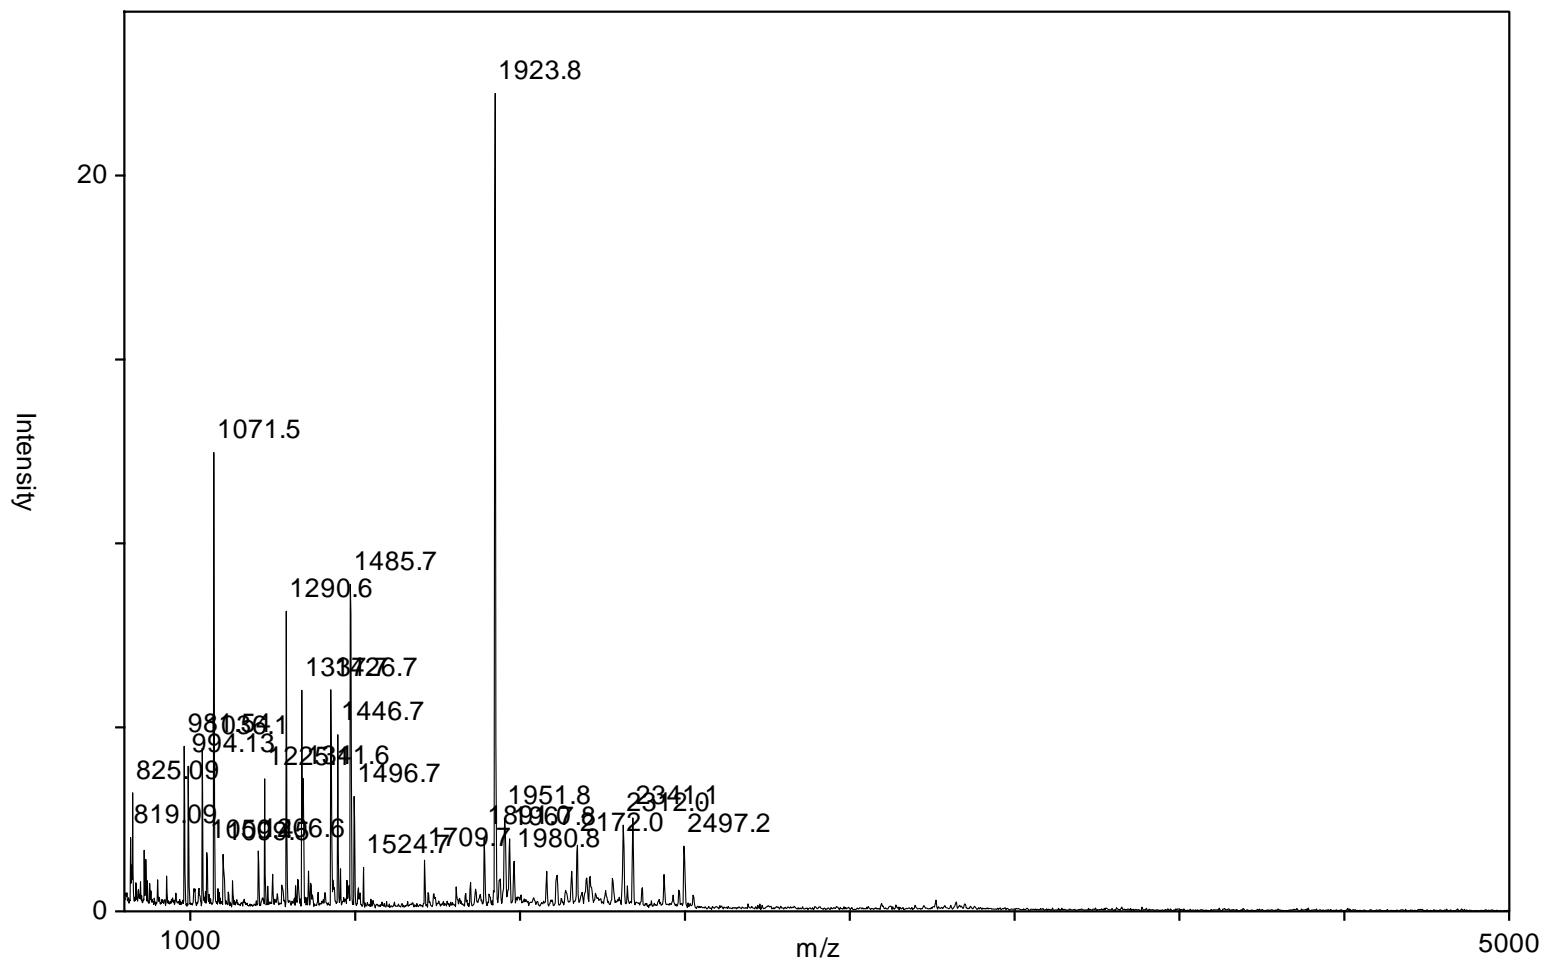

2D-BN-PAGE Spot 186: TC283413



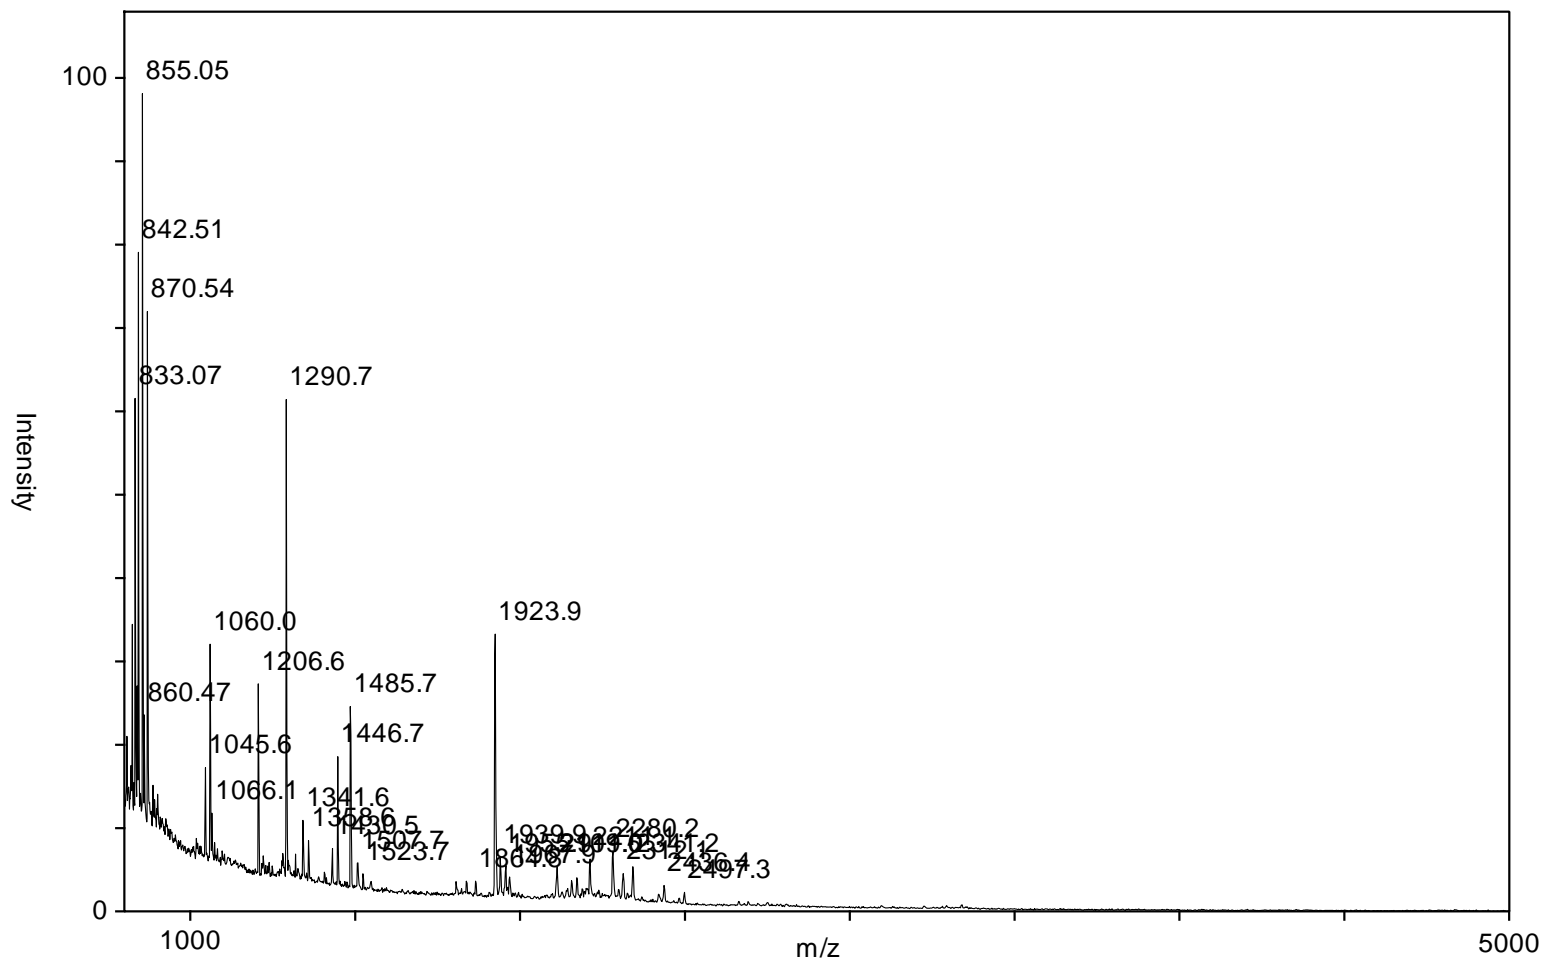

2D-BN-PAGE Spot 194: TC225511

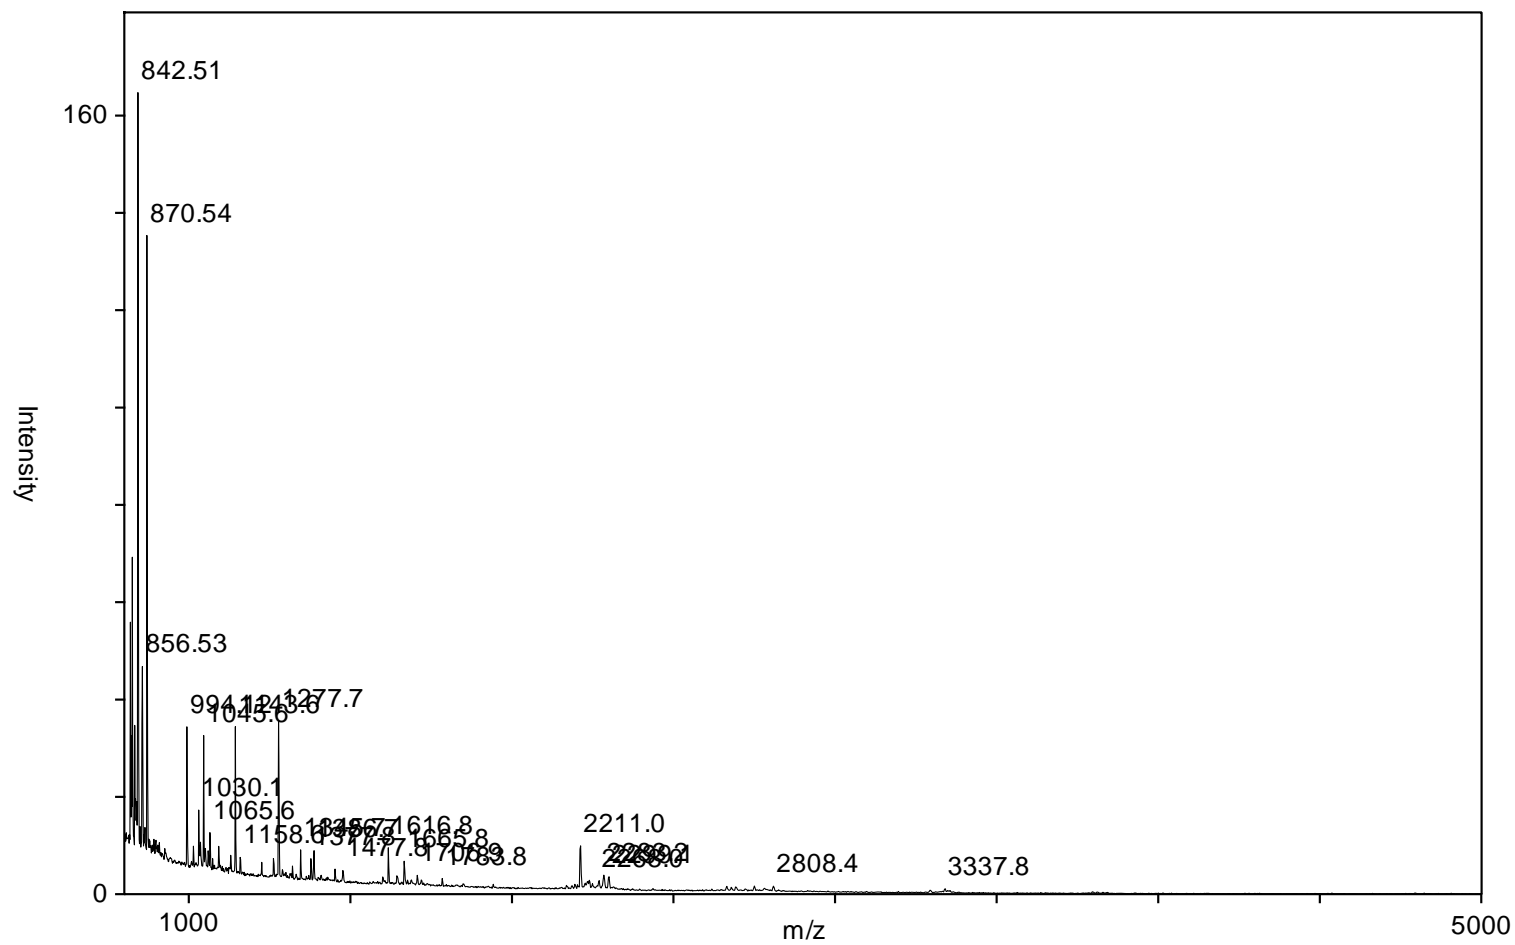

2D-BN-PAGE Spot 207: TC234236

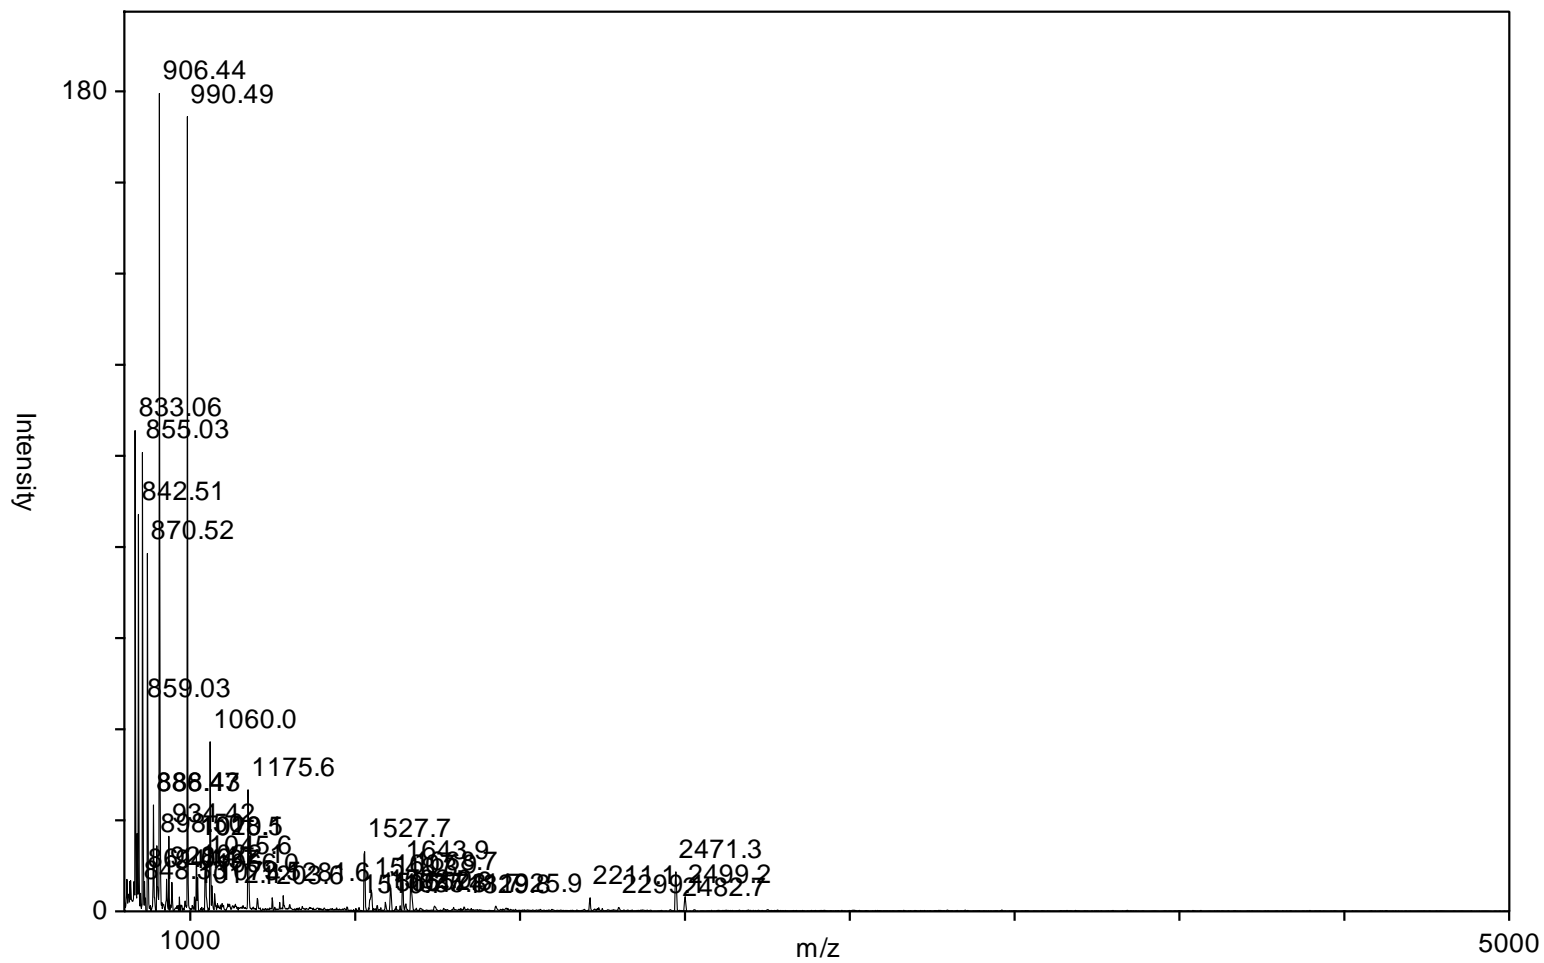

2D-BN-PAGE Spot 228: TC235538



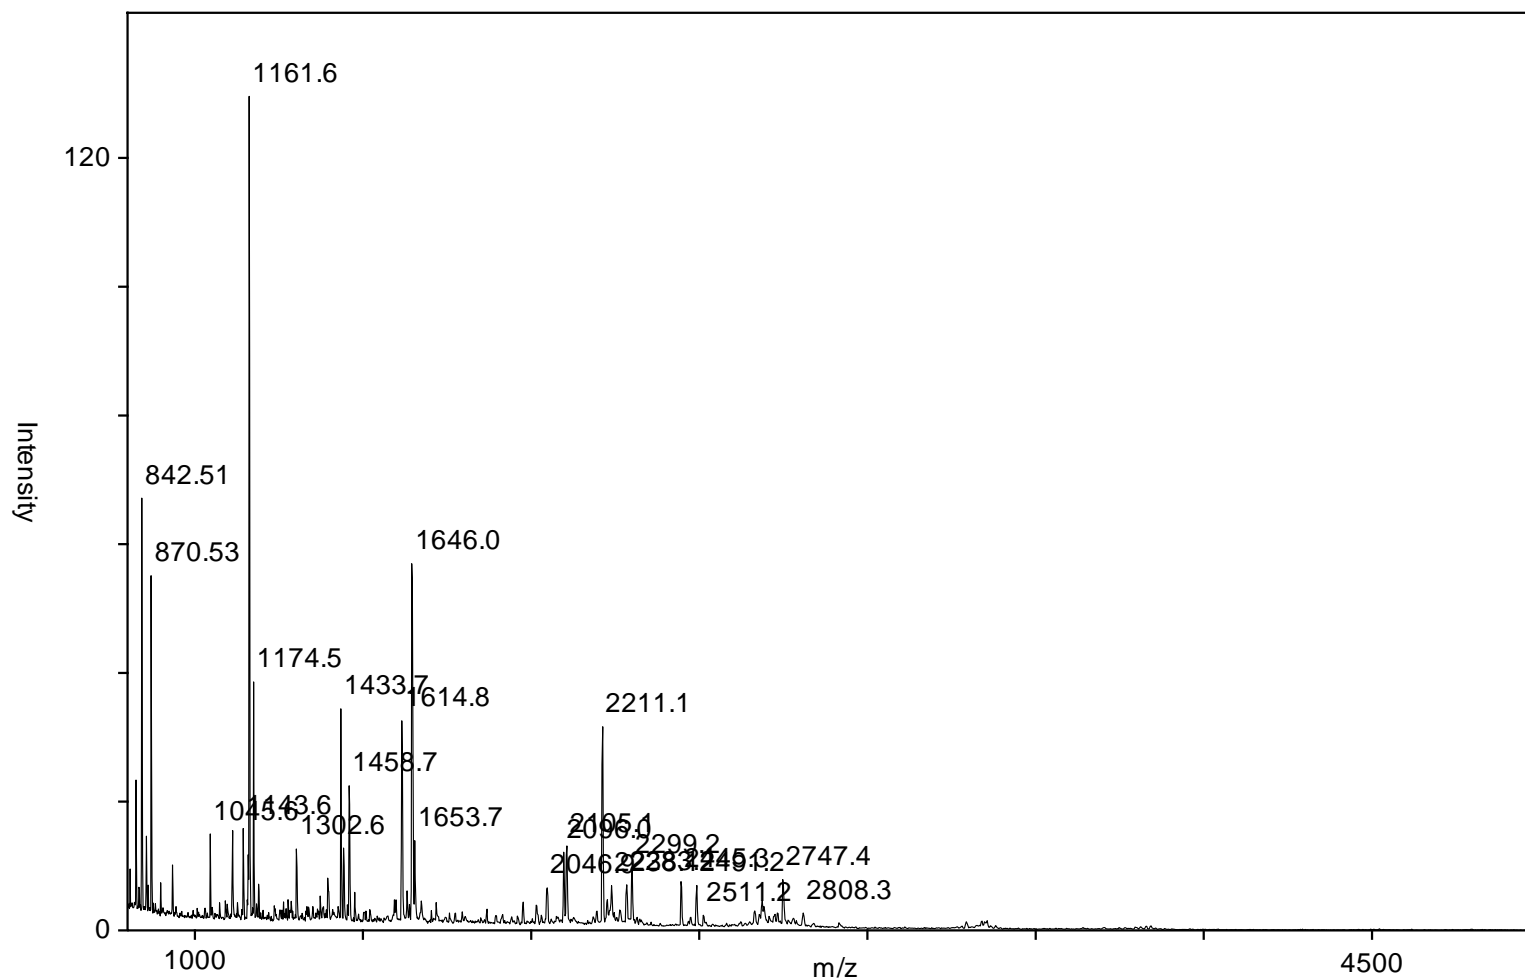

2D-BN-PAGE Spot 230: TC239826

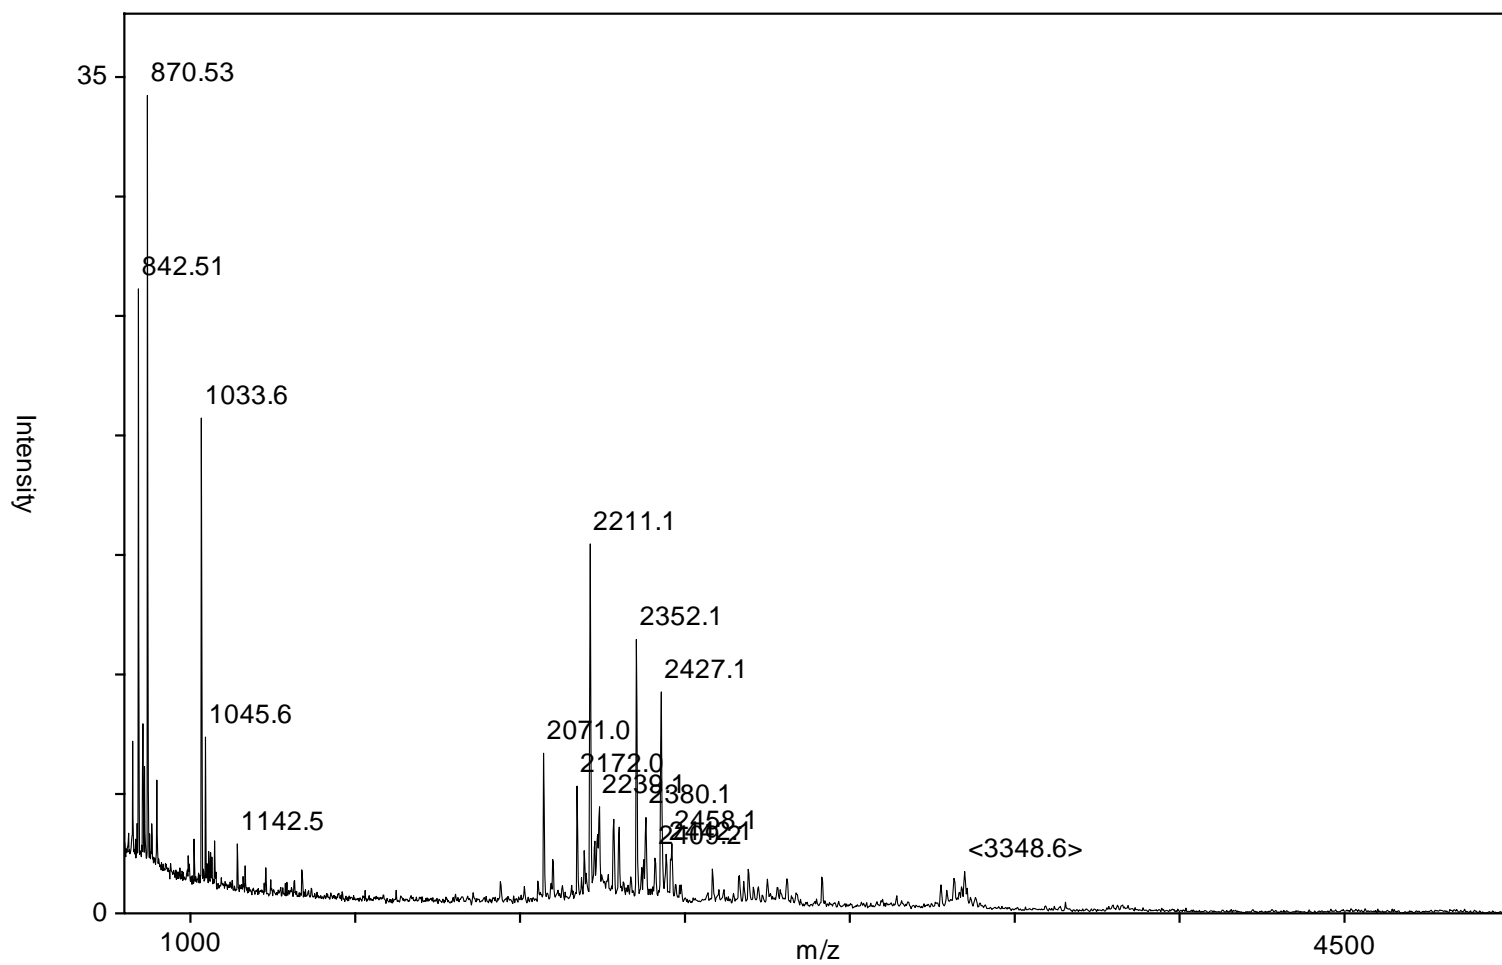

2D-BN-PAGE Spot 286: TC218606
